1 **High performance machine learning models can fully automate labeling of camera trap images**  
2 **for ecological analyses**

3

4 Robin Whytock<sup>1,2\*†</sup>, Jędrzej Świeżewski<sup>3†</sup>, Joeri A. Zwerts<sup>4</sup>, Tadeusz Bara-Słupski<sup>4</sup>, Aurélie Flore  
5 Koumba Pambo<sup>2</sup>, Marek Rogala<sup>3</sup>, Laila Bahaa-el-din<sup>5</sup>, Kelly Boekee<sup>6,7</sup>, Stephanie Brittain<sup>8,9</sup>, Anabelle  
6 W. Cardoso<sup>10</sup>, Philipp Henschel<sup>11,12</sup>, David Lehmann<sup>2,1</sup>, Brice Momboua<sup>2</sup>, Cisquet Kiebou Opepa<sup>13</sup>,  
7 Christopher Orbell<sup>11,1</sup>, Ross T. Pitman<sup>11</sup>, Hugh S. Robinson<sup>11,14</sup>, Katharine A. Abernethy<sup>1,12</sup>

8 † These authors contributed equally to the manuscript.

9 **\*Corresponding author:** Robin C. Whytock, [robbie.whytock1@stir.ac.uk](mailto:robbie.whytock1@stir.ac.uk)

10

11 <sup>1</sup> Faculty of Natural Sciences, University of Stirling, FK9 4LA, UK

12 <sup>2</sup> Agence Nationale des Parcs Nationaux, Libreville, Gabon

13 <sup>3</sup> Appsilon AI for Good, Warsaw, Poland

14 <sup>4</sup> Utrecht University, Heidelberglaan 8, 3584 CS Utrecht, The Netherlands

15 <sup>5</sup> School of Life Sciences, University of KwaZulu-Natal, South Africa

16 <sup>6</sup> Program for the Sustainable Management of Natural Resources, South West Region, Buea, Cameroon

17 <sup>7</sup> Center for Tropical Forest Science, Smithsonian Tropical Research Institute, Balboa, Ancon,

18 Republic of Panama

19 <sup>8</sup> The Interdisciplinary Centre for Conservation Science, Department of Zoology, University of Oxford,  
20 11a Mansfield Road, Oxford, OX1 3SZ

21 <sup>9</sup> The Institute of Zoology, Zoological Society of London, Outer Circle, London NW1 4RY

22 <sup>10</sup> Yale University, New Haven, CT 06520, USA

23 <sup>11</sup> Panthera, 8 West 40th Street, 18th Floor, New York, NY 10018, USA

24 <sup>12</sup> Institut de Recherche en Ecologie Tropicale, CENAREST, BP 842 Libreville, Gabon

25 <sup>13</sup> Wildlife Conservation Society, Republic of the Congo

26 <sup>14</sup> Wildlife Biology Program, W.A. Franke College of Forestry and Conservation, University of  
27 Montana, Natural Sciences Room 205, Missoula, Montana, 59812, USA

28

29 **ORCID IDs**

30

31 **Robin C. Whytock:** 0000-0002-0127-6071

32 **Jędrzej Świeżewski:** not available

33 **Joeri A. Zwerts:** 0000-0003-3841-6389

34 **Tadeusz Bara-Słupski:** not available

35 **Aurélie Flore Koumba Pambo:** not available

36 **Marek Rogala:** 0000-0002-9949-4551

37 **Laila Bahaa-el-din:** not available

38 **Kelly Boekee:** 0000-0001-8131-5204

39 **Stephanie Brittain:** 0000-0002-7865-0391

40 **Anabelle W. Cardoso:** 0000-0002-4327-7259

41 **Philipp Henschel:** not available

42 **David Lehmann:** 0000-0002-4529-8117

43 **Brice Momboua:** not available

44 **Cisquet Kiebou Opepa:** not available

45 **Christopher Orbell:** not available

46 **Ross. T. Pitman:** 0000-0002-3574-0063

47 **Hugh S. Robinson:** 0000-0002-4060-3143

48 **Katharine A. Abernethy:** 0000-0002-0393-9342

49

50 **Keywords:** artificial intelligence, birds, biodiversity, Central Africa, mammals

51 **Author contributions:** R.C.W, J.S., M.R., A.F.K.P., P.H., C.O., R.P., H.R., K.A. T.B. designed  
52 research; R.C.W., J.S., M.R. performed research; R.C.W., J.S. analyzed data; R.C.W., J.A.W, L.B.,  
53 K.B., A.C., D.L., B.M., C.K.O., C.O. collected data; R.W., J.S., J.A.Z., T.B., A.F.K.P, M.R., L.B.,  
54 K.B., S.B., A.C., P.H., D.L., C.O., H.R., K.A. wrote the paper.

55 **This PDF file includes:**

56 Main text

57 Figures 1 to 7

58 Tables 1 and 2

59 Supplementary Tables S1 to S4

60 Supplementary Figures S1 to S9

61 **Data and code availability statement:** All data and code will be publicly archived in the University of  
62 Stirling's publicly accessible data repository and given a unique DOI on acceptance. Code for the  
63 machine learning model is available for review online at  
64 [https://github.com/Appsilon/gabon\\_wildlife\\_training](https://github.com/Appsilon/gabon_wildlife_training). Code for the offline application to run the model  
65 is available at <https://github.com/Appsilon/wildlife-explorer> . R code for the ecological analyses are  
66 available for review online at [https://github.com/rcwhytock/Whytock\\_and\\_Swiezewski\\_et\\_al\\_2020/](https://github.com/rcwhytock/Whytock_and_Swiezewski_et_al_2020/).

## 66 **Abstract**

67 1. Ecological data are increasingly collected over vast geographic areas using arrays of digital sensors.  
68 Camera trap arrays have become the ‘gold standard’ method for surveying many terrestrial mammals  
69 and birds, but these arrays often generate millions of images that are challenging to process. This  
70 causes significant latency between data collection and subsequent inference, which can impede  
71 conservation at a time of ecological crisis. Machine learning algorithms have been developed to  
72 improve camera trap data processing speeds, but these models are not considered accurate enough for  
73 fully automated labeling of images.

74 2. Here, we present a new approach to building and testing a high performance machine learning model  
75 for fully automated labeling of camera trap images. As a case-study, the model classifies 26 Central  
76 African forest mammal and bird species (or groups). The model was trained on a relatively small  
77 dataset (*c.*300,000 images) but generalizes to fully independent data and outperforms humans in several  
78 respects (e.g. detecting ‘invisible’ animals). We show how the model’s precision and accuracy can be  
79 evaluated in an ecological modeling context by comparing species richness, activity patterns ( $n = 4$   
80 species tested) and occupancy ( $n = 4$  species tested) derived from machine learning labels with the  
81 same estimates derived from expert labels.

82 3. Results show that fully automated labels can be equivalent to expert labels when calculating species  
83 richness, activity patterns ( $n = 4$  species tested) and estimating occupancy ( $n = 3$  of 4 species tested) in  
84 completely out-of-sample test data ( $n = 227$  camera stations,  $n = 23868$  images). Simple thresholding  
85 (discarding uncertain labels) improved the model's performance when calculating activity patterns and  
86 estimating occupancy, but did not improve estimates of species richness.

87 4. We provide the user-community with a multi-platform, multi-language user interface for running the  
88 model offline, and conclude that high performance machine learning models can fully automate  
89 labeling of camera trap data.

## 90 **Introduction**

91 The urgent need to understand how ecosystems are responding to rapid environmental change has  
92 driven a ‘big data’ revolution in ecology and conservation (Farley, Dawson, Goring, & Williams,  
93 2018). High resolution ecological data are now streamed in real-time from satellites, Global Positioning  
94 System tags, bioacoustic detectors, cameras and other sensor arrays. The data generated offer consider-  
95 able opportunities to ecologists, but challenges such as data processing, data storage and data sharing  
96 cause latency between data gathering and ecological inference (i.e. creating derived ecological metrics,  
97 testing ecological hypotheses and quantifying ecological change), sometimes in the order of years or  
98 more. Overcoming these challenges could open the gateway to ecological ‘forecasting’, where direc-  
99 tional changes in ecological processes are detected in real time and near-term responses are predicted  
100 effectively using an iterative data gathering, model updating and model prediction approach (Dietze et  
101 al., 2018).

102  
103 Digital camera traps or wildlife ‘trail cams’ have revolutionized wildlife monitoring and are now the  
104 ‘gold standard’ for monitoring many medium to large terrestrial mammals (Glover-Kapfer, Soto  
105 Navarro, & Wearn, 2019). Animals and their behavior are identified in images either by manual label-  
106 ing, using citizen science platforms (Swanson et al., 2015) or, more recently, by using machine learning  
107 models (Norouzzadeh et al., 2018; Tabak et al., 2019; Willi et al., 2019). Machine learning models can  
108 at minimum separate true animal detections from non-detections (Wei, Luo, Ran, & Li, 2020) or in the  
109 most advanced examples identify species, count individuals and describe behavior (Norouzzadeh et al.,  
110 2018). These recent advances in machine learning have increased the speed at which camera trap data  
111 are analyzed but, in all cases we are aware of, the outputs (e.g. species labels) are not used to make eco-  
112 logical inference directly. Instead, machine learning models are typically used as a ‘first pass’ to iden-  
113 tify and group images belonging to individual species for full or partial manual validation at a later  
114 stage, or to cross-validate labels from citizen science platforms (Willi et al., 2019). This can substan-

115 tially reduce manual labeling effort but many hundreds or thousands of photos might still need to be la-  
116 beled manually. Thus, although machine learning models are reducing manual data processing times,  
117 ecologists are not yet comfortable using the outputs (e.g. species labels) as part of a completely auto-  
118 mated workflow. This is despite the development of advanced machine learning models that classify  
119 species in camera trap images with accuracy that matches or exceeds humans (Norouzzadeh et al.,  
120 2018; Tabak et al., 2019).

121

122 One significant challenge limiting the application of machine learning models to camera trap data is  
123 that models rarely generalize well to completely out-of-sample data (i.e. data from new, spatially and  
124 temporally independent studies), particularly when used to classify animals to species level (Beery,  
125 Van Horn, & Perona, 2018). Models can quickly learn the features of specific camera ‘stations’ (the  
126 spatial replicate in camera trap studies) such as the general background instead of learning features of  
127 the animal itself. This problem is further amplified by the fact that rare species in the training data  
128 might only ever appear at a limited number of camera stations, so training and validation data are rarely  
129 independent. Various approaches can be used to reduce these biases, such as carefully ensuring that  
130 training and validation data are independent (e.g. by using data from multiple studies), and by using  
131 data augmentation such as adding noise to training data in the form of image transformations. Until the  
132 problem of generalization can be overcome, machine learning models for classifying camera trap im-  
133 ages will remain an important tool for reducing manual labeling effort, but they will not achieve their  
134 full potential for creating fully automated pipelines for data analysis.

135

136 Machine learning models also have the potential to be deployed inside camera trap hardware in the  
137 field at the ‘edge’ (i.e. on micro-computers installed inside hardware that collects data), with summa-  
138 rized results (e.g. species labels) transmitted in real-time via a Global System for Mobile Communica-  
139 tions networks or via satellite (Glover-Kapfer et al., 2019). In geographically remote areas or time-sen-  
140 sitive situations (e.g. law enforcement) this would greatly reduce the latency between data capture and

141 interpretation, and reduce the expense and effort required to collect data in remote regions by removing  
142 the need to transfer data-heavy images across wireless networks. However, before ‘smart’ cameras be-  
143 come a reality, it is essential that users understand how uncertainty in machine learning model predic-  
144 tions might impact derived ecological metrics and analyses, which are often sensitive to biases (e.g.  
145 false positives in occupancy models). To achieve this, there is a need to develop workflows that test the  
146 performance of machine learning models in an ecological modeling context that goes beyond simple  
147 measures of precision and accuracy.

148

149 Ideally, if machine learning models had 100% precision and accuracy (e.g. for species identification),  
150 camera trap data could be collected, labeled automatically using the model and the results used to di-  
151 rectly calculate ecological metrics or as variables in ecological models. However, the reality is that ma-  
152 chine learning models are imperfect. It is therefore uncertain what levels of precision and accuracy are  
153 needed to meet the requirements of ecological analyses. This is particularly the case for the spatial and  
154 temporal analyses of animal distributions in camera trap data, which require specialized ecological  
155 models (e.g. occupancy models) that account for imperfect detection (MacKenzie et al., 2002).

156

157 In this paper, we describe the approach used to build a new high-performance machine learning model  
158 that identifies species in camera trap images (26 species/groups of Central African forest mammals and  
159 birds) that generalizes to spatially independent data. To evaluate how well the machine learning model  
160 labeling precision and accuracy performs in an ecological modeling context, we (1) evaluate how un-  
161 certainties in the precision and accuracy of machine learning labels affect ecological inference (derived  
162 metrics of species richness, activity patterns and occupancy) compared to the same metrics calculated  
163 using expert, manually generated labels, and (2) propose a workflow to ‘ground truth’ the performance  
164 of machine learning models for camera trap data in an ecological modeling context. We discuss the im-  
165 plications of these results for making fully automated ecological inference from camera trap data using  
166 the outputs of machine learning models. We also provide the user community with an easily installed,

167 open-source graphical user interface that needs no understanding of machine learning to run the model  
168 offline on both camera trap images and videos.

169

## 170 **Methods**

### 171 ***Data preparation***

172 As a case study, the model was developed for classifying terrestrial forest mammals and birds in Cen-  
173 tral Africa (see Table S1 for further details on species and groups), where camera traps are now fre-  
174 quently deployed over large spatial scales to survey secretive birds and mammals in remote and inac-  
175 cessible landscapes (Bahaa-el-din & Cusack, 2018; Bessone et al., 2020; O'Brien et al., 2020). Train-  
176 ing data were obtained from multiple countries and sources (c.1.6 million images; reduced to  $n =$   
177 347120 images after data processing; Table 1). Each source used different camera trap models (Re-  
178 conyx, Bushnell, Cuddeback, Panthera Cams) and images were diverse in resolution, quality (e.g.  
179 sharpness, illumination) and color. Individual studies also used different field protocols for camera de-  
180 ployment but all were focused on detecting terrestrial forest mammals, with cameras installed on trees  
181 approximately 30 - 40 cm above ground level. The exception to this was data from (Cardoso et al.,  
182 2020) who installed cameras at a height of approximately 1 m for the primary purpose of detecting for-  
183 est elephants *Loxodonta cyclotis*. Camera trap configuration was set to be highly sensitive in some  
184 cases and images were often captured in a series of rapid, short bursts (e.g. taking 10 images consecu-  
185 tively). This resulted in long sequences of very similar images, for example showing an animal walking  
186 in front of the camera (Figure S1).

187

188 **Table 1.** Sources of training data used to train the machine learning model for classifying species in  
189 camera trap images, sorted by number of images provided. The final subset of data used to train the  
190 model was  $n = 347120$  images (see later).

| Source               | Country           | Reference                   | <i>n</i> images |
|----------------------|-------------------|-----------------------------|-----------------|
| Anabelle Cardoso     | Gabon             | (Cardoso et al., 2020)      | 102418          |
| Kelly Boekee         | Cameroon          | -                           | 123954          |
| Cisquet Kiebou Opepa | Republic of Congo | -                           | 60393           |
| Joeri Zwerts         | Cameroon          | -                           | 36027           |
| Laila Bahaa-el-Din   | Gabon             | (Bahaa-el-din et al., 2013) | 16558           |
| Stephanie Brittain   | Cameroon          | -                           | 7770            |

191

192 It was important to account for image sequences when selecting a validation set during the model train-  
193 ing phase, since there was a risk of highly similar images being present in both the training and valida-  
194 tion sets. To address this issue, the training and validation split was performed based on image meta-  
195 data (timing of images and image source) to identify unique ‘events’ and camera locations that were  
196 not replicated across the training and validation split (Norouzzadeh et al., 2018). This solution posed a  
197 challenge for maintaining class balances in the training and validation sets, but it reduced the risk non-  
198 independent training and validation sets. A total of 27 classes were used to train the model, which were  
199 mostly mammals or mammal groups ( $n = 21$ ), birds ( $n = 4$ ), humans ( $n = 1$ ) and ‘blank’ images (i.e. no  
200 mammal, bird or human). Details of taxonomy and justification for species groups are in Table S1.

201

### 202 ***Issues identified in the training data***

203 Our ‘real-life’ training data had not been pre-processed or professionally curated for the purposes of  
204 training machine learning models and naturally contained errors that arise from hardware faults, human  
205 error and different approaches to manual species labeling by experts. We identified three primary  
206 sources of error. The first was over-exposed images (a hardware fault) where the image foreground was  
207 ‘flooded’ by the flash (usually at night), making the image appear mostly white. Animals in these



204 images were sometimes partially visible and could be classified by a skilled human observer, despite  
205 the loss of color information, texture and other detail. However, over-exposed images presented a  
206 challenge for the machine learning model because white dominated the image regardless of the species.

207

208 The second main source of error was caused by under-exposed images. This error was revealed after  
209 inspecting model outputs during the training phase, and showed that highly under-exposed images  
210 appeared almost entirely or entirely black to a human observer, but the machine learning model was  
211 capable of using information in the image to detect and correctly classify the species (Figure 1).

212

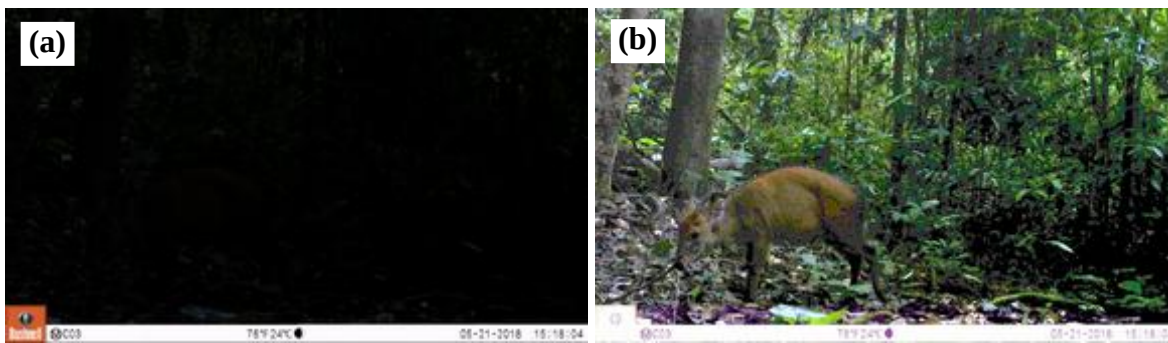

213

214 **Figure 1.** (a) Raw image from the dataset, labeled by experts as "blank", but classified by the machine  
215 learning model with high certainty as a red duiker. (b) The same image as in (a), but manually  
216 brightened by narrowing the displayed color spectrum, reveals a red duiker is present and the model  
217 was correct.

218

219 The final source of error in the training data was mis-labeled images (e.g. confusing similar species,  
220 such as chimpanzee *Pan troglodytes* and gorilla *Gorilla gorilla*) and using different approaches to  
221 labeling, for example one data source combined all primates into 'monkey', whereas other data sources  
222 separated apes from other primates.

223

224 We used an iterative approach to address these issues that consisted of model training, validation, error

225 correction (correcting mis-labeled images in the training data) and model updating. In particular, we  
226 carefully inspected images that appeared to be incorrectly labeled by the model, but which were labeled  
227 with high confidence. This approach revealed hidden problems in the data, such as the presence of  
228 animals in under-exposed images that would have otherwise led us to underestimate the model's  
229 performance.

230

### 231 ***Machine learning model***

232 We chose the established ResNet50 architecture to build the model (He, Zhang, Ren, & Sun, 2016).  
233 Transfer learning was used to speed up training and we used weights pre-trained on the ImageNet  
234 dataset. We identified species using the entire image frame without using bounding boxes and used ba-  
235 sic augmentation (horizontal flips, rotations, zoom, lighting and contrast adjustments, and warps) dur-  
236 ing training, but not during model validation. We used one-cycle policy training (Smith, 2018) and  
237 trained using progressive resizing in two stages. Details on the training scheme and implementation can  
238 be found in our GitHub repository ([https://github.com/Appsilon/gabon\\_wildlife\\_training](https://github.com/Appsilon/gabon_wildlife_training)). It is worth  
239 noting that most of the training approaches and many of the mechanisms we used to enhance training  
240 were taken directly or almost directly from the fast.ai Python library (<https://github.com/fastai>), exem-  
241 plifying how exceptionally robust the library is. We trained the models on various virtual machines  
242 equipped with GPU processing units, run on Google Cloud Platform with resources granted by a  
243 Google Cloud Education grant.

244

### 245 ***Out-of-sample test data***

246 One of the major limitations to model performance for camera trap images is the ability to generalize  
247 predictions to new, independent camera stations, i.e. unique locations with different backgrounds not  
248 seen during model training (Beery et al., 2018). Since our objective was to create a model that could  
249 generalize well to new study sites, we tested the final model's performance using a new out-of-sample

250 dataset that was completely spatially and temporally independent from the data used to train the model.  
251 These out-of-sample data consisted of images from 227 camera stations surveyed between 16 January  
252 2018 and 4 October 2019 in central and southern Gabon in closed canopy forest. Cameras also differed  
253 from the models used in the training data (Panthera Cams V4 and V5), but field protocols were similar  
254 and cameras were placed approximately 30 cm above the ground on a tree at a distance of c. 3 – 5 m  
255 perpendicular to the center of animal trails. Single-frame images were captured using medium sensitiv-  
256 ity settings, and images were separated by a minimum of 1 s. The aim of the study was to survey the  
257 small-to-large mammal community, with a particular focus on great apes (*Pan troglodytes*, *Gorilla go-*  
258 *rilla*), forest elephants *Loxodonta cyclotis*, leopard *Panthera pardus* and golden cat *Caracal aurata*.  
259 These data ( $n = 23868$  images, median 75, range 1 - 545 images per station) were manually labeled by  
260 an expert (co-author CO).

261

### 262 ***Summary of model's general performance***

263 To allow general comparison of our model's performance with other similar models in the literature  
264 (Norouzzadeh et al., 2018; Tabak et al., 2019; Willi et al., 2019) we calculated top-one and top-five  
265 accuracies using the out-of-sample data. Top-one accuracy is the percent of expert labels that match the  
266 top-ranking label generated by the machine learning model. Top-five accuracy calculates the percent of  
267 expert labels that match any of the top five ranking machine learning generated labels. Top-one  
268 accuracy for the overall machine learning model was 77.63% and top-five accuracy was 94.24% (Table  
269 S2; Figures S2 & S3). After aggregating labels of similar species that were frequently mis-classified by  
270 the model into a reduced set of 11 classes, top-one and top-five accuracies increased to 79.92% and  
271 95.99%, respectively (Figure S4). The model can classify around 4000 images (c.0.5 MB in size) per  
272 hour using an Intel® Core™ i7-8665U CPU @ 1.90GHz × 8 and the model can operate 24/7 if  
273 necessary. For comparison, based on our experience, manual labeling can be done at speeds ranging  
274 from 125 to 500 images per hour depending on the quality of the images and if images are captured in

275 sequences (which can be faster to label manually).

276

277 We also compared the precision and recall for each species from our optimal model (see later, Table 2)  
278 with precision and recall for the same species reported for the model used by the WildlifeInsights web-  
279 platform ([www.wildlifeinsights.org](http://www.wildlifeinsights.org)). This global project uses a deep convolutional neural network  
280 trained using Google's Tensorflow framework and a training dataset of 8.7M images, comprising 614  
281 species.

282

### 283 ***Comparing derived ecological metrics using machine learning labels and expert labels***

284 We calculated three common ecological metrics for the out-of-sample data (raw species richness at in-  
285 dividual camera stations, activity patterns for four focal species, and occupancy for four focal species)  
286 separately using the manually generated, expert labels and the machine learning generated labels.  
287 Species richness (the number of species in a discrete unit of space and time) can be used to quantify  
288 temporal and spatial changes in biodiversity. Although other measures of species diversity exist, we  
289 chose this simple metric because it is widely used in the ecology literature despite its limitations. Activ-  
290 ity patterns describe the diel activity patterns of focal species (M. Rowcliffe, 2019) and are typically  
291 calculated to understand fundamental life history traits and behavior such as temporal niche partition-  
292 ing. Occupancy models are hierarchical models commonly fitted to camera trap data because they can  
293 account for imperfect detection (which rarely equals 1) to estimate the conditional probability that a  
294 site is 'occupied' by a species given it was not detected (MacKenzie et al., 2002). Covariates such as  
295 measures of vegetation cover can be included in both the detection and occupancy component models.  
296 These models are relatively complex, and small changes in detection histories (presence or absence of a  
297 species during a discrete time interval), false positives or false negatives can dramatically affect results  
298 (Royle & Link, 2006). We therefore predicted that occupancy estimates obtained using machine learn-  
299 ing generated labels would compare poorly with estimates using expert, manually generated labels.

300

301 The four focal species used for calculating activity patterns and occupancy were African golden cat,  
302 chimpanzee, leopard and African forest elephant. These species were chosen because they were the  
303 focus of the camera trap survey that generated the out-of-sample test data and because they are  
304 conservation priority species in Central Africa. We also initially included western lowland gorilla but  
305 we had too few unique captures of this species (only seven of 227 stations having > 5 captures) to fit  
306 either activity pattern models or occupancy models.

307

### 308 ***Thresholding and overall model performance***

309 All three metrics derived from machine learning labels were re-calculated using a threshold approach,  
310 where labels were excluded if the model's predicted confidence was below a given threshold. The  
311 thresholds tested ranged from 0 (no threshold) to 90%, increasing in 10% intervals. For each of the  
312 three ecological metrics, we then re-calculated results using the machine learning labels and compared  
313 these with results from the expert labeled dataset using various statistical measures (see later). We also  
314 calculated the effect of removing data on sample size, top-one balanced accuracy and top-five accuracy  
315 for the overall model, and on four standard measures of model precision and accuracy (precision, re-  
316 call, F1 score, and balanced accuracy for each species using the `confusionMatrix` function in the  
317 `caret` R package (Kuhn, 2020).

318

319 Estimated species richness from machine learning generated labels and expert labels was compared  
320 using linear regression fitted by least squares. Species richness from expert labels was used as the  
321 predictor variable and species richness from machine learning labels was used as the response. For each  
322 threshold, we evaluated how well species richness from machine learning labels correlated with expert  
323 labels by calculating the slope coefficient and variance explained ( $R^2$ ).

324

325 Diel activity patterns were calculated for all four focal species using the `fitact` function (200 boot-  
326 strap replicates from the model) using the activity R package (J. M. Rowcliffe, Kays, Kranstauber, Car-  
327 bone, & Jansen, 2014; M. Rowcliffe, 2019). For each species and threshold combination, we tested if  
328 there was a significant difference in diel activity (proportion of 24 h day active) estimated by machine  
329 learning labels and expert labels using the `compareAct` function, expecting no difference using an al-  
330 pha level of 0.05.

331

332 Single season, single species occupancy models were fitted using the `occu` function from the un-  
333 marked R package (Fiske & Chandler, 2011). Detection histories were collapsed to five-day occasion  
334 lengths as a compromise between achieving model stability and ensuring an adequate number of repli-  
335 cates for each site. In the detection component model, we included Elevation (m), Date (first day of the  
336 five day occasion length) and Date<sup>2</sup> (to allow for non-linear, seasonal changes in detection) as covari-  
337 ates. In the occupancy component model, Elevation (m), Distance to the Nearest River (m), Distance to  
338 the Nearest Road (m) and mean distance to the Nearest Village (m) were included as continuous pre-  
339 dictors without interactions. All covariates were mean-centered and scaled by 1 SD to prevent conver-  
340 gence issues. We did not perform model selection and predicted occupancy for the 227 camera stations  
341 using the full model. We then compared occupancy predictions ( $n = 227$  camera stations) for no thresh-  
342 old (i.e. using all data), and the nine thresholds using linear regression fitted by least squares as de-  
343 scribed previously for the species richness comparison.

344

## 345 **Results**

### 346 ***Effect of thresholding on overall model performance***

347 Regardless of the threshold used, top-five accuracy for the overall model predictions on the out-of-  
348 sample data were consistently close to or above 95% (Figure 2). To achieve a top-one balanced  
349 accuracy of 90% or more for the overall model, a threshold of  $\geq 70\%$  confidence was required and >

350 25% of the data were discarded (Figure 2). With a threshold of 70% confidence (i.e. excluding labeled  
351 images below 70% confidence), top-one balanced accuracies for 16 of the 27 classes were > 90% and a  
352 further five were > 75% (Table 2). Top-one balanced accuracies for the remaining seven classes ranged  
353 from 50% to 70% (Table 2). All other measures of accuracy and precision at all thresholds are in Table  
354 S3 and Figure 3 shows the confusion matrix for the out-of-sample data after excluding labels below  
355 70% confidence (see Figure S5 for the confusion matrix of aggregated labels after thresholding).

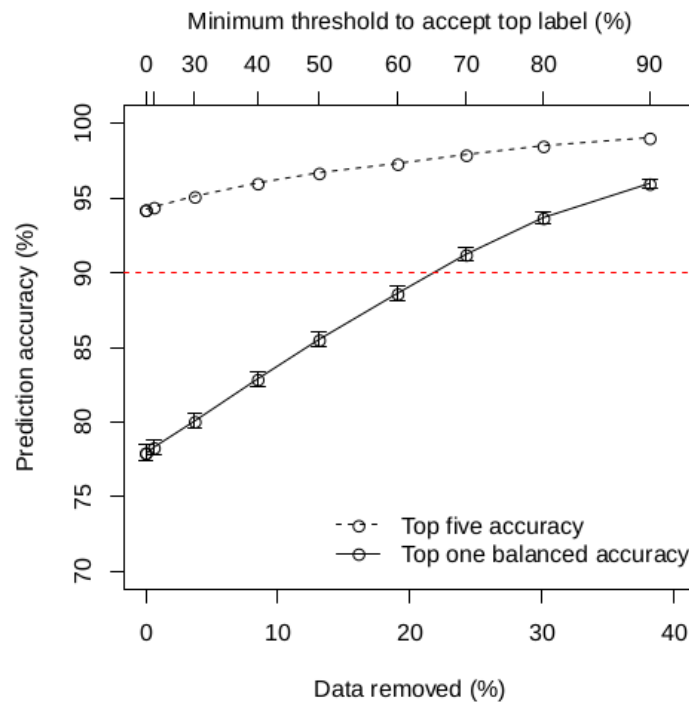

356  
357 **Figure 2.** Relationship between threshold level to accept top label, % of data discarded and overall top-  
358 five and top-one balanced accuracy (+/- 95% CI) for predictions on out-of-sample test data.

359  
360 **Table 2.** Precision, recall, accuracy, F1 score and prevalence (%s) for the 27 classes (Table S1) in the  
361 out-of-sample test data after removing labels with a predicted confidence < 70%. Species are sorted  
362 from lowest to highest balanced accuracy. For comparison, the precision and recall for the model used  
363 by the wildlifeinsights.org web platform are given in brackets. Orange indicates our model performed  
364 worse than the WildlifeInsights model for a given species, and purple indicates our model performed  
365 better. Note that this comparison should be interpreted with caution. Ideally, we would run the  
366 WildlifeInsights model on our out-of-sample test data, but data sharing restrictions prevented this.  
367 Where our species or groups could not be compared with an equivalent class on WildlifeInsights this is  
368 indicated as no equivalent class (NE). If precision and recall cannot be estimated because of

369 insufficient training and validation data this is indicated as ‘needs more data’ (NMD).

| Species                            | Precision %                  | Recall %                    | F1   | Prevalence | Balanced Accuracy |
|------------------------------------|------------------------------|-----------------------------|------|------------|-------------------|
| Civet_African_Palm                 | NMD ( <i>NMD</i> )           | NMD ( <i>NMD</i> )          | NA   | NA         | NA                |
| Gorilla                            | NMD ( <i>NMD</i> )           | NMD ( <i>NMD</i> )          | NA   | 0.4        | 50                |
| Rail_Nkulengu                      | <b>0.0</b> ( <i>47.2</i> )   | <b>0.0</b> ( <i>48.6</i> )  | NA   | NA         | 50                |
| <sup>a</sup><br>Guineafowl_Crested | 100 ( <i>99.8</i> )          | <b>5.3</b> ( <i>91.2</i> )  | 10   | 0.1        | 52.6              |
| Mandrillus                         | <b>83.9</b> ( <i>96.1</i> )  | <b>29</b> ( <i>72.3</i> )   | 43.1 | 1.8        | 64.5              |
| Blank                              | 98.1 ( <i>98.3</i> )         | <b>40.3</b> ( <i>78.7</i> ) | 57.1 | 3.6        | 70.1              |
| Buffalo_African                    | <b>97.5</b> ( <i>91.1</i> )  | <b>55.7</b> ( <i>73.6</i> ) | 70.9 | 1.2        | 77.8              |
| Bird                               | 11.2 ( <i>NE</i> )           | 60.0 ( <i>NE</i> )          | 18.9 | 0.1        | 79.7              |
| Chevrotain_Water                   | <b>100</b> ( <i>NMD</i> )    | <b>67.4</b> ( <i>NMD</i> )  | 80.6 | 0.2        | 83.7              |
| Guineafowl_Black                   | <b>70.6</b> ( <i>79.6</i> )  | <b>72.7</b> ( <i>79.5</i> ) | 71.6 | 0.2        | 86.3              |
| Cat_Golden                         | <b>96.0</b> ( <i>NMD</i> )   | <b>78.0</b> ( <i>NMD</i> )  | 86.1 | 1          | 89                |
| Pangolin                           | <b>94.1</b> ( <i>NMD</i> )   | <b>80.0</b> ( <i>NMD</i> )  | 86.5 | 0.1        | 90                |
| Duiker_Yellow_Backed               | <b>97.5</b> ( <i>88.8</i> )  | <b>83.8</b> ( <i>72.3</i> ) | 90.2 | 2.9        | 91.9              |
| Human                              | <b>78.4</b> ( <i>84.8</i> )  | <b>87.4</b> ( <i>75.2</i> ) | 82.6 | 4          | 93.2              |
| Chimpanzee                         | <b>83.5</b> ( <i>87</i> )    | <b>88.4</b> ( <i>71.4</i> ) | 85.9 | 2.2        | 94                |
| Monkey                             | 70.7 ( <i>NE</i> )           | 92.0 ( <i>NE</i> )          | 80   | 2.9        | 95.4              |
| Mongoose                           | <b>83.5</b> ( <i>NMD</i> )   | <b>91.0</b> ( <i>NMD</i> )  | 87.1 | 0.4        | 95.5              |
| Rat_Giant                          | <b>68.2</b> ( <i>76</i> )    | <b>93.8</b> ( <i>75.8</i> ) | 78.9 | 0.1        | 96.9              |
| <sup>b</sup><br>Duiker_Red         | <b>95.9</b> ( <i>95.6</i> )  | <b>96.5</b> ( <i>79.6</i> ) | 96.2 | 30.8       | 97.3              |
| Duiker_Blue                        | <b>90.04</b> ( <i>98.2</i> ) | <b>97.0</b> ( <i>65.7</i> ) | 93.6 | 17.6       | 97.4              |
| Hog_Red_River                      | <b>97.0</b> ( <i>82.7</i> )  | <b>95.7</b> ( <i>84.7</i> ) | 96.3 | 6.5        | 97.7              |
| Squirrel                           | <b>85.9</b> ( <i>98.6</i> )  | <b>95.8</b> ( <i>67.6</i> ) | 90.6 | 0.9        | 97.8              |
| Leopard_African                    | <b>92.8</b> ( <i>85.2</i> )  | <b>96.0</b> ( <i>61.4</i> ) | 94.4 | 2.2        | 97.9              |
| Elephant_African                   | <b>91.9</b> ( <i>94.4</i> )  | <b>98.4</b> ( <i>84.2</i> ) | 95.1 | 19.3       | 98.2              |
| Porcupine_Brush_Tailed             | <b>93.9</b> ( <i>89.4</i> )  | <b>98.9</b> ( <i>42.1</i> ) | 96.3 | 0.5        | 99.4              |
| Genet                              | <b>95.3</b> ( <i>89.2</i> )  | <b>99.3</b> ( <i>65.6</i> ) | 97.2 | 0.8        | 99.6              |
| Mongoose_Black_Footed              | <b>92.9</b> ( <i>NMD</i> )   | <b>100</b> ( <i>NMD</i> )   | 96.3 | 0.1        | 100               |



a  
 370 Used precision and recall for similar *Guttera plumifera* from WildlifeInsights  
 b  
 371 Used precision and recall for *Cephalophus callipygus* from WildlifeInsights  
 372

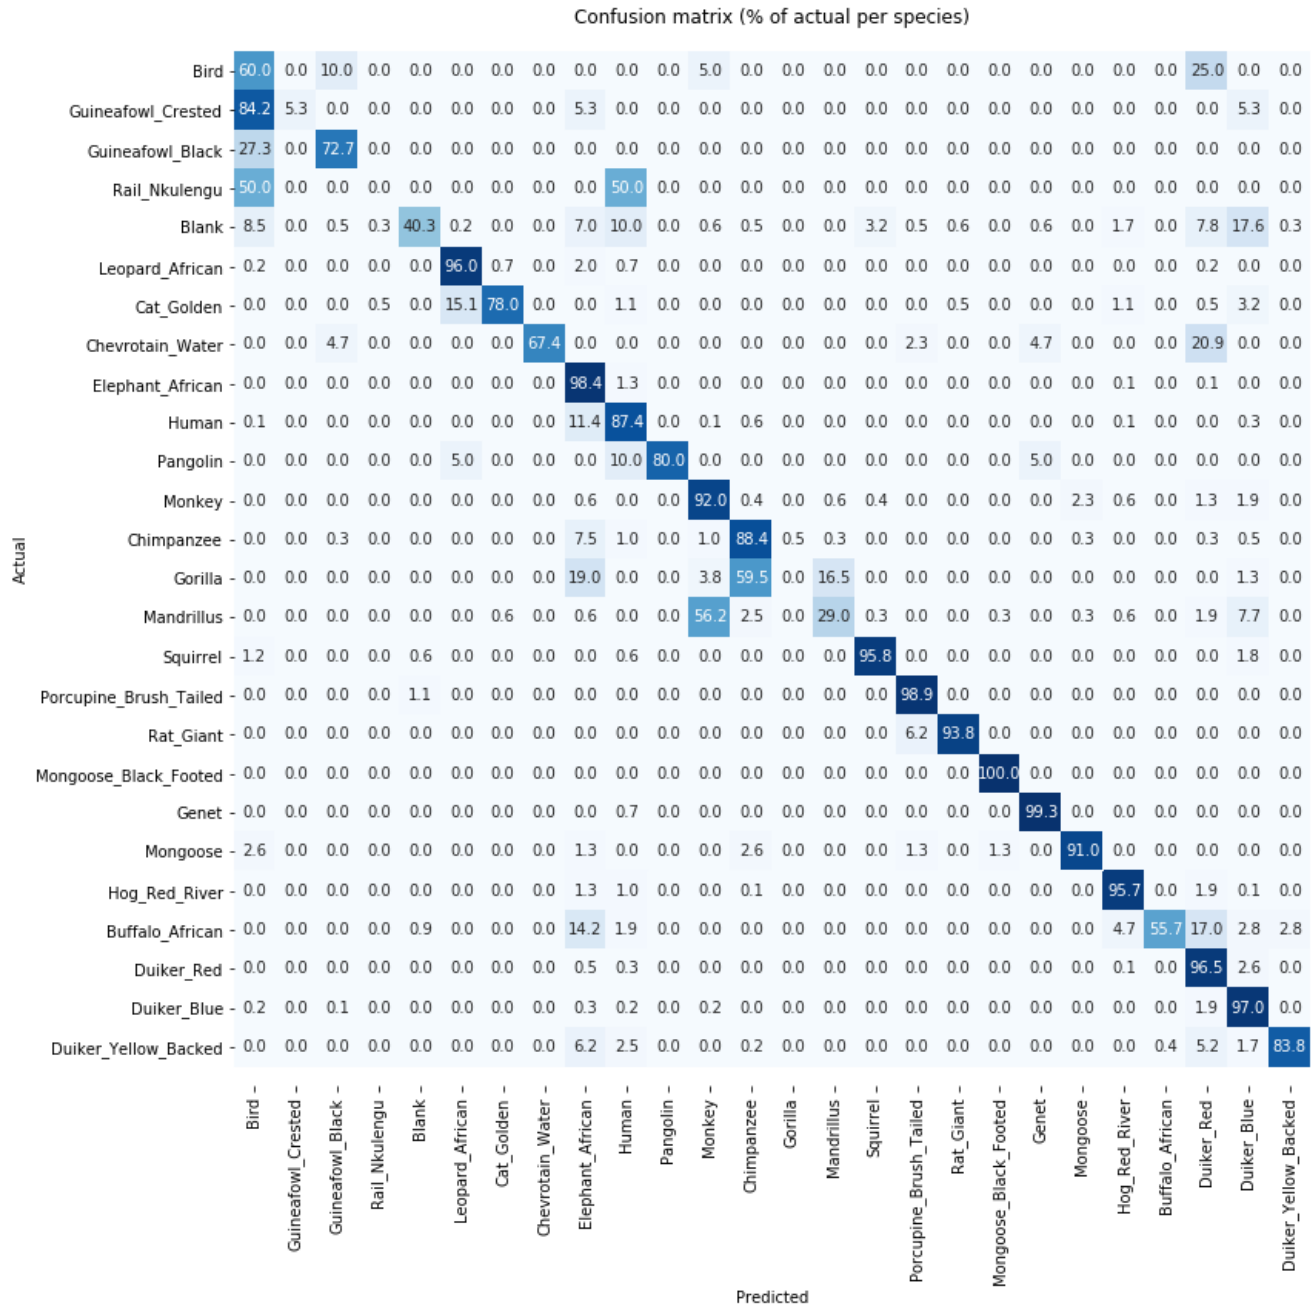

373

374 **Figure 3.** Confusion matrix (% correct labels for each species/group) showing model performance on  
 375 out of sample test data after excluding labels below a confidence threshold of 70% (each row is  
 376 normalized independently). Figure S6 shows the confusion matrix with absolute numbers.

377

378

379 **Species richness**

380 Species richness estimated by machine learning labels and expert labels was strongly correlated at all  
381 thresholds used (Figure 4). There was a general tendency for species richness to be underestimated by  
382 machine learning as the threshold increased, and the slope of the relationship was close to 1 with no  
383 threshold.

384

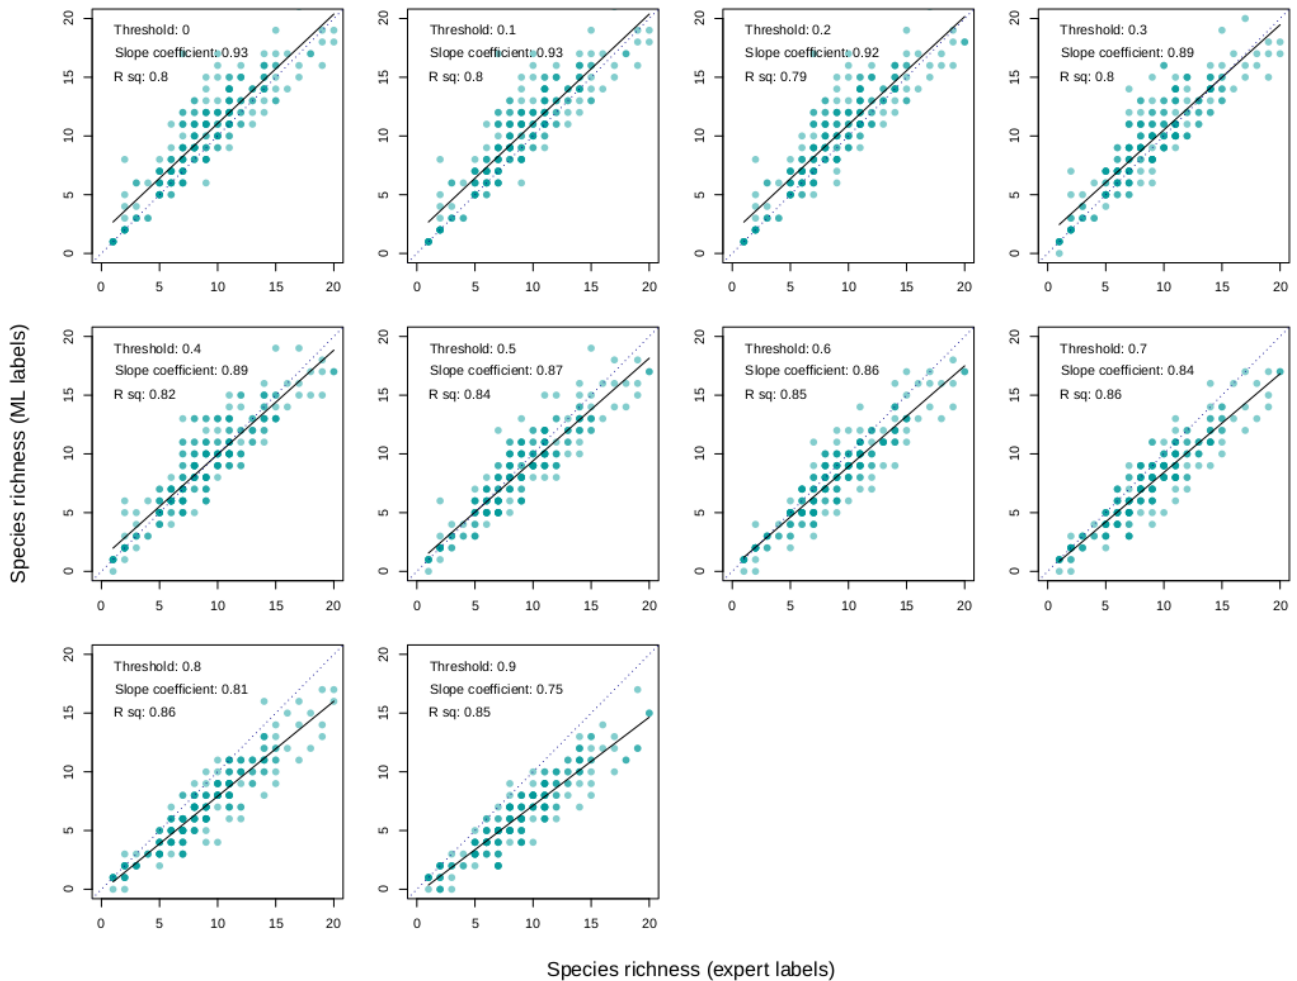

385

386 **Figure 4.** Relationship between species richness at each camera station ( $n = 227$ ) predicted by the  
387 machine learning model (y-axis) and species richness predicted from expert labels (x-axis) for no  
388 threshold and the nine thresholds used after predicting on the out-of-sample test data. The dotted line  
389 shows where a 1:1 relationship would fit the data.

390

391 **Activity patterns**

392 Above a threshold of 70% there was no significant difference between diel activity patterns estimated  
393 by machine learning labels and expert labels for all four focal species in the out-of-sample test data  
394 (Figure 5; Table S4).

395

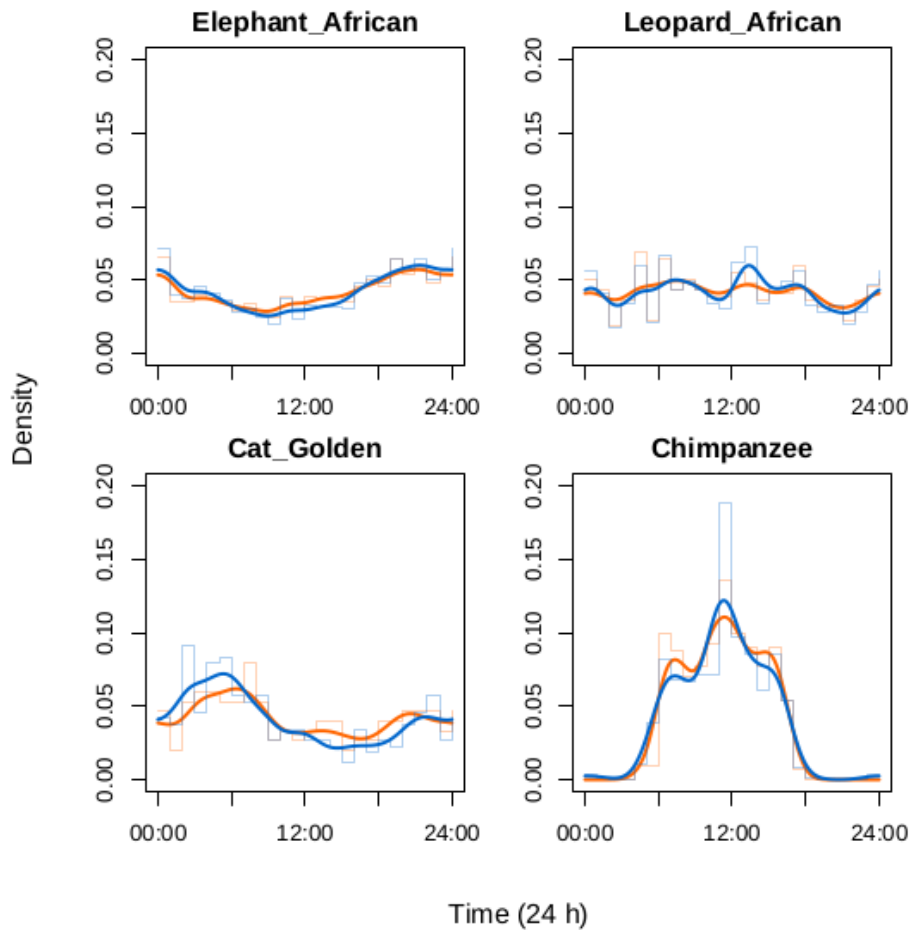

396

397 **Figure 5.** Estimated activity patterns for the four focal species in the out-of-sample test data using  
398 machine learning labels (orange;  $n = 18078$  observations after excluding labels below 70%  
399 confidence) and expert labels (blue;  $n = 23868$  observations).

400

401

## 402 **Occupancy models**

403 As expected, occupancy estimates made using machine learning labels were sometimes inconsistent  
404 with those made using expert labels, and thresholding had a dramatic impact on inference in some  
405 cases (Figure 6). For golden cat and leopard, which are predicted with high accuracy and precision by  
406 our machine learning model, occupancy estimates from machine learning labels and expert labels were  
407 highly correlated at all thresholds (Figure S8). African elephant occupancy estimates using machine  
408 learning labels improved dramatically as the threshold increased, but chimpanzee occupancy estimates  
409 from machine learning labels were consistently uncorrelated with those estimated using expert labels  
410 (Figure 6).

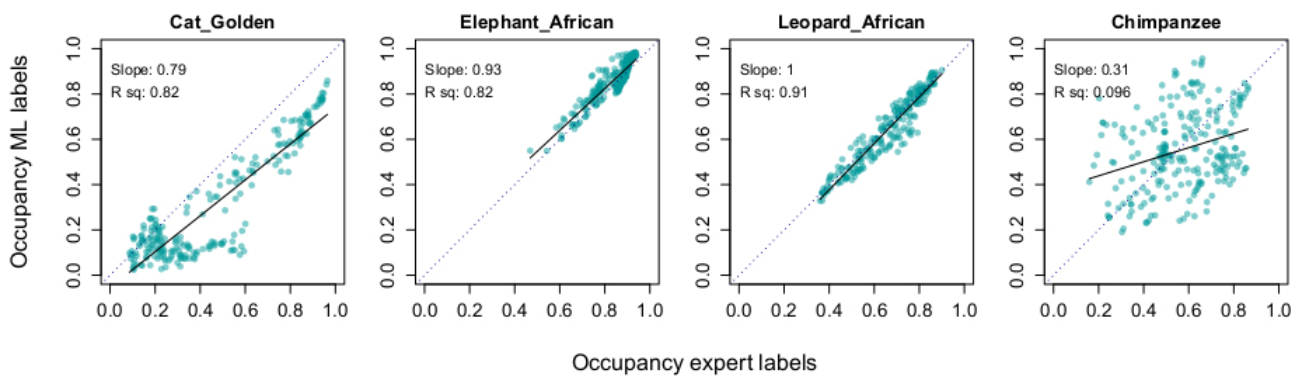

411 **Figure 6.** Relationship between estimated occupancy probability for  $n = 227$  camera stations (points)  
412 from machine learning (ML) labels (y-axis) and expert labels (x-axis) for the four focal species after  
413 discarding labels below a 90% threshold of predicted confidence. Plots for all thresholds tested are  
414 shown in Figure S8.

415

## 416 **Discussion**

417 Machine learning models have the potential to fully automate labeling of camera trap images without  
418 the need for manual validation. This would allow ecologists to rapidly process data and use the outputs  
419 (e.g. species labels) directly in ecological analyses, but it has been uncertain how this can be achieved.

420 In particular, models published to date do not evaluate their predictive performance in an ecological  
421 modeling context (Beery et al., 2018; Norouzzadeh et al., 2018; Tabak et al., 2019; Willi et al., 2019).  
422 Here, we compared ecological metrics calculated on an out-of-sample test dataset using machine learn-  
423 ing labels with the same metrics calculated using expert, manually generated labels. Using our new,  
424 high performance species classification model that generalizes to out-of-sample data, we show machine  
425 learning labels can be used in a fully automated workflow that removes the need for manual validation  
426 prior to conducting ecological analyses.

427

428 We used an established architecture for the machine learning model. However, other more recent archi-  
429 tectures could yield further increases in performance. The ResNeXt (Xie, Girshick, Dollar, Tu, & He,  
430 2017), the ResNeSt (Zhang et al., 2020) and the EfficientNet (Tan & Le, 2020) families of network ar-  
431 chitectures are particularly worth exploring in this context. Another avenue of possible further im-  
432 provement is to use an approach based on a sequence of models. One natural step is to first detect a  
433 bounding box for an animal with a localisation model (Beery et al., 2019) and later classify only the  
434 content found in that box. Independently, another step can be introduced where a model is trained to  
435 first identify an aggregated species class (comprised of species that share similar characteristics; e.g.  
436 see Figure S4), and later dedicated models are trained to identify the individual species within these ag-  
437 gregated classes.

438

439 We used a relatively small training set (c.300,000 images here vs 3.2 million in (Norouzzadeh et al.,  
440 2018) and 8.7M used by (Ahumada et al., 2020)) and a large number of individual classes, yet our  
441 model achieved high precision and accuracy even when tested on completely out-of-sample data, which  
442 is considered a significant challenge for the field (Beery et al., 2018, 2019). We believe this encourag-  
443 ing result can be explained both by the machine learning approaches used (e.g. the fast.ai framework  
444 and image augmentation), and because forest camera traps in the tropics are often deployed in very  
445 similar settings, with animals captured at a predictable distance from the camera (usually on a path)

446 with a general background of green and brown vegetation. This is in contrast to camera trap images  
447 from more open habitats, where animals are detected across a wide range of distances and backgrounds  
448 (Beery et al., 2018). On the other hand, informational richness in the background of photos taken in  
449 forest settings poses a significant challenge to machine learning models as well as human experts, as il-  
450 lustrated in Figure 7.

451

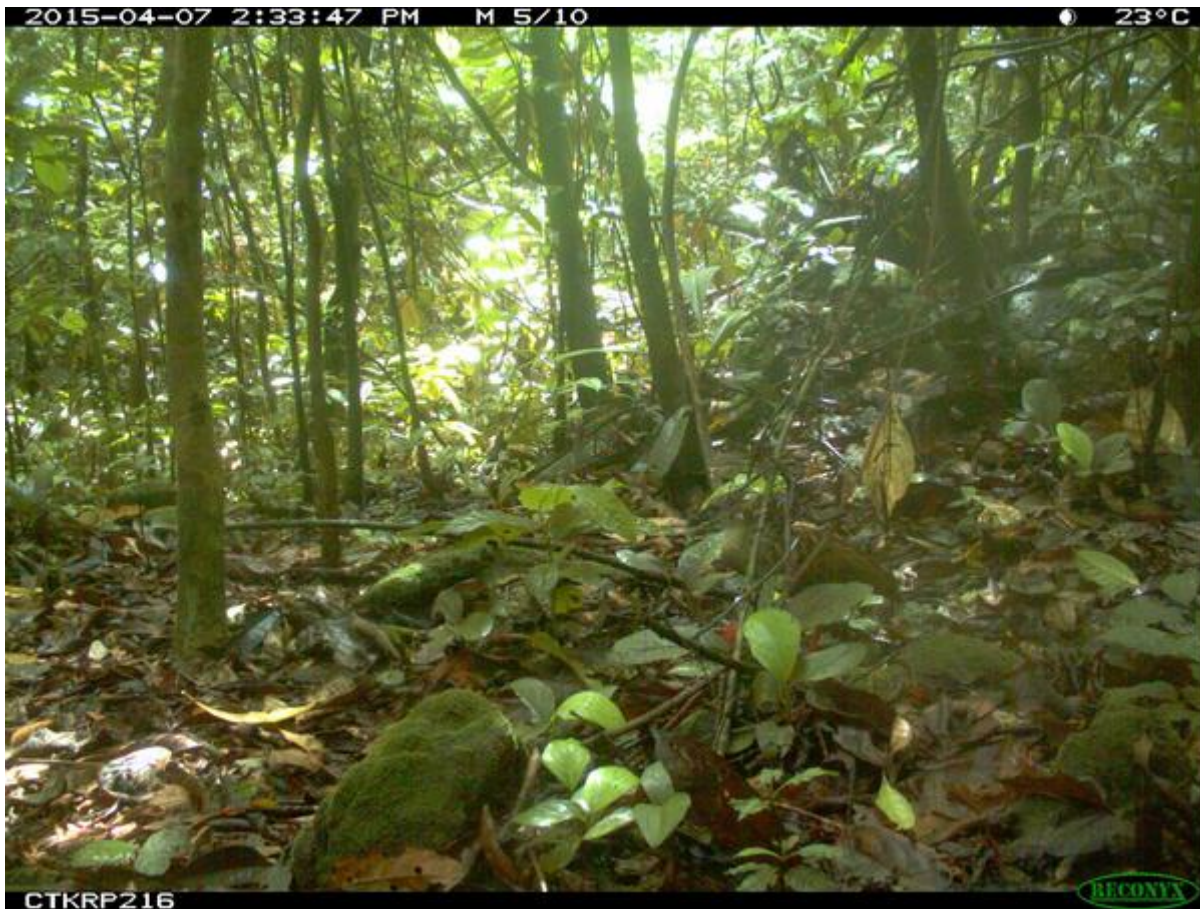

452

453 **Figure 7.** An image correctly classified as nkulengu rail by our machine learning model but marked as  
454 blank by an expert. The bird is visible slightly right of center. The dark beak is pointing left and most  
455 of the body is hidden behind branches and leaves. A section of its characteristic red legs is visible  
456 between the leaves. The model used features from the beak and head region to identify the bird (see  
457 Figure S9).

458

459 Thresholding improved the overall performance of the model and its performance for individual  
460 species. In our tests we ‘discarded’ labels with low confidence but these data could equally be

461 classified manually if sample sizes were small. It is important to note, however, that this additional  
462 effort to manually label low confidence images would not have improved inference in our example  
463 ecological analyses, with the exception of chimpanzee occupancy estimates. Chimpanzee images had  
464 the lowest measure of precision among the four focal species, which suggests that true detection events  
465 were probably missed frequently, resulting in false negatives (Figure S2). Species that were classified  
466 with the highest precision and accuracy were either relatively unique in their shape, color and pattern  
467 (e.g. African leopard, the ‘Genet’ group) or were well represented in the training data. We recommend  
468 that users of our model in Central Africa use a threshold of 70% to accept labels and have created an  
469 offline, multi-platform software tool that can label large batches of images or videos, and display  
470 simple maps of species presence/absence and species richness (available at  
471 <https://github.com/Appsilon/wildlife-explorer>). The software also outputs the labels in a format that can  
472 be used for calculating activity patterns or for use in occupancy models. We do not fully automate these  
473 analyses at present (in part because of logistical constraints and delays caused by the COVID19  
474 pandemic), but we anticipate these features will be integrated into future releases.

475

476 If machine learning models can fully automate labeling of camera trap images, the first question likely  
477 to be posed by most ecologists is ‘Should we?’. Camera trap images contain a wealth of information  
478 beyond species identity that would be missed using our model such as behavior, demography, individ-  
479 ual phenotype and body condition. A trained model is also limited to detecting and classifying the  
480 species in the training dataset, and by definition cannot detect new species. Some machine learning  
481 models can already classify behavior (Norouzzadeh et al., 2018) and other future models will achieve  
482 this and much more. In our opinion fully automated labels can and should be used in ecological analy-  
483 ses, but only after validation (and re-validation) from an ecological perspective, and to answer clearly  
484 defined questions. Each use-case will also differ in the benefits that can be gained from fully automated  
485 analysis. A conservation manager with tens of thousands of images collected on a rolling basis might

486 accept a trade-off between increased speed of data analysis and having to discard images with uncertain  
487 labels, but a scientist testing hypotheses for peer-reviewed publication might prefer to view all of the  
488 images manually. We recommend that in all cases models should be validated on a continual basis us-  
489 ing sub-sampled data to detect potentially new or hidden biases. Model accuracy could change if field  
490 protocols or environmental conditions change in unexpected ways (e.g. heavy snowfall in temperate  
491 zones). However, during model evaluation we found that expert labels in the training and validation  
492 data were also never themselves ‘perfect’, and perhaps high performance machine learning models of-  
493 fer a more consistent means of analyzing camera trap data than manual labeling because biases are pre-  
494 dictable and can be quantified explicitly.

495

496 Camera traps are commonly used worldwide by conservation practitioners whose normal scope of  
497 work might not allow sufficient time for the handling, processing, and analyzing of large quantities of  
498 digital data. The authors personally know of several large camera trap databases that have not been an-  
499 alyzed years after data collection ended, often because of a lack of resources or technical expertise.  
500 New web-based platforms for ecological data are seeking to address this problem by allowing users to  
501 upload data to the cloud where it is stored and analyzed using machine learning models (Aide et al.,  
502 2013; Ahumada et al., 2020), but a lack of fast internet access can be a barrier to using such platforms  
503 and our offline application can fill this important gap. The next generation of camera traps will also  
504 have embedded machine learning models following the current rise in edge-computing technology. To-  
505 gether, edge and cloud computing will open the door to national and international real-time ecological  
506 forecasting at unprecedented spatial and temporal scales. We anticipate that the model, software and  
507 validation workflow presented here could revolutionize how camera trap data are processed and ana-  
508 lyzed, and conclude that high performance machine learning models can be used for fully automated la-  
509 beling of camera trap data for ecological analyses.

510



511 **Acknowledgments**

512 RW was funded by the EU 11eme FED ECOFAC6 program grant to the National Parks Agency of  
513 Gabon. Appsilon Data Science funded the machine learning model and software development costs.  
514 Cloud computing costs were funded by a Google Cloud Education Grant awarded to KA. Camera trap  
515 data from co-authors KB and CKO were kindly made available by the Tropical Ecology Assessment  
516 and Monitoring Network (now <https://wildlifeinsights.org>).

517 **References**

- Ahumada, J. A., Fegraus, E., Birch, T., Flores, N., Kays, R., O'Brien, T. G., ... Dancer, A. (2020). Wildlife Insights: A Platform to Maximize the Potential of Camera Trap and Other Passive Sensor Wildlife Data for the Planet. *Environmental Conservation*, 47(1), 1–6.  
doi:10.1017/S0376892919000298
- Aide, T. M., Corrada-Bravo, C., Campos-Cerqueira, M., Milan, C., Vega, G., & Alvarez, R. (2013). Real-time bioacoustics monitoring and automated species identification. *PeerJ*, 1, e103.  
doi:10.7717/peerj.103
- Bahaa-el-din, L., & Cusack, J. J. (2018). Camera trapping in Africa: Paving the way for ease of use and consistency. *African Journal of Ecology*, 56(4), 690–693. doi:10.1111/aje.12581
- Bahaa-el-din, L., Henschel, P., Aba'a, R., Abernethy, K., Bohm, T., Bout, N., ... Hunter, L. (2013). Notes on the distribution and status of small carnivores in Gabon, 48, 11.
- Beery, S., Morris, D., Yang, S., Simon, M., Norouzzadeh, A., & Joshi, N. (2019). Efficient Pipeline for Automating Species ID in new Camera Trap Projects. *Biodiversity Information Science and Standards*, 3, e37222. doi:10.3897/biss.3.37222
- Beery, S., Van Horn, G., & Perona, P. (2018). Recognition in Terra Incognita. In *Proceedings of the European Conference on Computer Vision (ECCV)* (pp. 456–473). Retrieved from [https://openaccess.thecvf.com/content\\_ECCV\\_2018/html/Beery\\_Recognition\\_in\\_Terra\\_ECCV\\_2018\\_paper.html](https://openaccess.thecvf.com/content_ECCV_2018/html/Beery_Recognition_in_Terra_ECCV_2018_paper.html)
- Bessone, M., Kühl, H. S., Hohmann, G., Herbinger, I., N'Goran, K. P., Asanzi, P., ... Fruth, B. (2020). Drawn out of the shadows: Surveying secretive forest species with camera trap distance

- sampling. *Journal of Applied Ecology*, 57(5), 963–974. doi:10.1111/1365-2664.13602
- Cardoso, A. W., Malhi, Y., Oliveras, I., Lehmann, D., Ndong, J. E., Dimoto, E., ... Abernethy, K. (2020). The Role of Forest Elephants in Shaping Tropical Forest–Savanna Coexistence. *Ecosystems*, 23(3), 602–616. doi:10.1007/s10021-019-00424-3
- Dietze, M. C., Fox, A., Beck-Johnson, L. M., Betancourt, J. L., Hooten, M. B., Jarnevich, C. S., ... White, E. P. (2018). Iterative near-term ecological forecasting: Needs, opportunities, and challenges. *Proceedings of the National Academy of Sciences*, 115(7), 1424–1432. doi:10.1073/pnas.1710231115
- Farley, S. S., Dawson, A., Goring, S. J., & Williams, J. W. (2018). Situating Ecology as a Big-Data Science: Current Advances, Challenges, and Solutions. *BioScience*, 68(8), 563–576. doi:10.1093/biosci/biy068
- Fiske, I., & Chandler, R. (2011). unmarked: An R Package for Fitting Hierarchical Models of Wildlife Occurrence and Abundance. *Journal of Statistical Software*, 43(10), 1–23.
- Glover-Kapfer, P., Soto Navarro, C. A., & Wearn, O. R. (2019). Camera-trapping version 3.0: current constraints and future priorities for development. *Remote Sensing in Ecology and Conservation*, 5(3), 209–223. doi:10.1002/rse2.106
- He, K., Zhang, X., Ren, S., & Sun, J. (2016). Identity Mappings in Deep Residual Networks. In B. Leibe, J. Matas, N. Sebe, & M. Welling (Eds.), *Computer Vision – ECCV 2016* (pp. 630–645). Cham: Springer International Publishing. doi:10.1007/978-3-319-46493-0\_38
- Kuhn, M. (2020). caret: Classification and Regression Training. *R Package Version 6.0-86*. Retrieved from <https://CRAN.R-project.org/package=caret>
- MacKenzie, D. I., Nichols, J. D., Lachman, G. B., Droege, S., Royle, J. A., & Langtimm, C. A. (2002). Estimating Site Occupancy Rates When Detection Probabilities Are Less Than One. *Ecology*, 83(8), 2248–2255. doi:10.1890/0012-9658(2002)083[2248:ESORWD]2.0.CO;2
- Norouzzadeh, M. S., Nguyen, A., Kosmala, M., Swanson, A., Palmer, M. S., Packer, C., & Clune, J. (2018). Automatically identifying, counting, and describing wild animals in camera-trap images with deep learning. *Proceedings of the National Academy of Sciences*, 115(25), E5716–E5725. doi:10.1073/pnas.1719367115
- O’Brien, T. G., Ahumada, J., Akampurila, E., Beaudrot, L., Boekee, K., Brncic, T., ... Strindberg, S.

- (2020). Camera trapping reveals trends in forest duiker populations in African National Parks. *Remote Sensing in Ecology and Conservation*, 6(2), 168–180. doi:10.1002/rse2.132
- Rowcliffe, J. M., Kays, R., Kranstauber, B., Carbone, C., & Jansen, P. A. (2014). Quantifying levels of animal activity using camera trap data. *Methods in Ecology and Evolution*, 5(11), 1170–1179. doi:10.1111/2041-210X.12278
- Rowcliffe, M. (2019). activity: Animal Activity Statistics. *R Package v 1.3*. Retrieved from <https://CRAN.R-project.org/package=activity>
- Royle, J. A., & Link, W. A. (2006). Generalized Site Occupancy Models Allowing for False Positive and False Negative Errors. *Ecology*, 87(4), 835–841. doi:10.1890/0012-9658(2006)87[835:GSOMAF]2.0.CO;2
- Smith, L. N. (2018). A disciplined approach to neural network hyper-parameters: Part 1 -- learning rate, batch size, momentum, and weight decay. *ArXiv:1803.09820 [Cs, Stat]*. Retrieved from <http://arxiv.org/abs/1803.09820>
- Swanson, A., Kosmala, M., Lintott, C., Simpson, R., Smith, A., & Packer, C. (2015). Snapshot Serengeti, high-frequency annotated camera trap images of 40 mammalian species in an African savanna. *Scientific Data*, 2(1), 150026. doi:10.1038/sdata.2015.26
- Tabak, M. A., Norouzzadeh, M. S., Wolfson, D. W., Sweeney, S. J., Vercauteren, K. C., Snow, N. P., ... Miller, R. S. (2019). Machine learning to classify animal species in camera trap images: Applications in ecology. *Methods in Ecology and Evolution*, 10(4), 585–590. doi:10.1111/2041-210X.13120
- Tan, M., & Le, Q. V. (2020). EfficientNet: Rethinking Model Scaling for Convolutional Neural Networks. *ArXiv:1905.11946 [Cs, Stat]*. Retrieved from <http://arxiv.org/abs/1905.11946>
- Wei, W., Luo, G., Ran, J., & Li, J. (2020). Zilong: A tool to identify empty images in camera-trap data. *Ecological Informatics*, 55, 101021. doi:10.1016/j.ecoinf.2019.101021
- Willi, M., Pitman, R. T., Cardoso, A. W., Locke, C., Swanson, A., Boyer, A., ... Fortson, L. (2019). Identifying animal species in camera trap images using deep learning and citizen science. *Methods in Ecology and Evolution*, 10(1), 80–91. doi:10.1111/2041-210X.13099
- Xie, S., Girshick, R., Dollar, P., Tu, Z., & He, K. (2017). Aggregated Residual Transformations for Deep Neural Networks (pp. 1492–1500). Presented at the Proceedings of the IEEE Conference

on Computer Vision and Pattern Recognition. Retrieved from

[https://openaccess.thecvf.com/content\\_cvpr\\_2017/html/Xie\\_Aggregated\\_Residual\\_Transformations\\_CVPR\\_2017\\_paper.html](https://openaccess.thecvf.com/content_cvpr_2017/html/Xie_Aggregated_Residual_Transformations_CVPR_2017_paper.html)

Zhang, H., Wu, C., Zhang, Z., Zhu, Y., Zhang, Z., Lin, H., ... Smola, A. (2020). ResNeSt: Split-

Attention Networks. *ArXiv:2004.08955 [Cs]*. Retrieved from <http://arxiv.org/abs/2004.08955>

518 **Supplementary Information for:**

519

520 **High performance machine learning models can fully automate labeling of camera trap images**  
521 **for ecological analyses**

522

523 Robin Whytock<sup>1,2\*†</sup>, Jędrzej Świeżewski<sup>3†</sup>, Joeri A. Zwerts<sup>4</sup>, Tadeusz Bara-Słupski<sup>4</sup>, Aurélie Flore  
524 Koumba Pambo<sup>2</sup>, Marek Rogala<sup>3</sup>, Laila Bahaa-el-din<sup>5</sup>, Kelly Boekee<sup>6,7</sup>, Stephanie Brittain<sup>8,9</sup>, Anabelle  
525 W. Cardoso<sup>10</sup>, Philipp Henschel<sup>11,12</sup>, David Lehmann<sup>2,1</sup>, Brice Momboua<sup>2</sup>, Cisquet Hector Ror Kiebou  
526 Opepa<sup>13</sup>, Christopher Orbell<sup>11,1</sup>, Ross T. Pitman<sup>11</sup>, Hugh S. Robinson<sup>11,14</sup>, Katharine A. Abernethy<sup>1,12</sup>

527 † These authors contributed equally to the manuscript.

528 **\*Corresponding author:** Robin C. Whytock, [robbie.whytock1@stir.ac.uk](mailto:robbie.whytock1@stir.ac.uk)

529 Paste manuscript title here

530 <sup>1</sup> Faculty of Natural Sciences, University of Stirling, FK9 4LA, UK

531 <sup>2</sup> Agence Nationale des Parcs Nationaux, Libreville, Gabon

532 <sup>3</sup> Appsilon AI for Good, Warsaw, Poland

533 <sup>4</sup> Utrecht University, Heidelberglaan 8, 3584 CS Utrecht, The Netherlands

534 <sup>5</sup> School of Life Sciences, University of KwaZulu-Natal, South Africa

535 <sup>6</sup> Program for the Sustainable Management of Natural Resources, South West Region, Buea, Cameroon

536 <sup>7</sup> Center for Tropical Forest Science, Smithsonian Tropical Research Institute, Balboa, Ancon,

537 Republic of Panama

538 <sup>8</sup> The Interdisciplinary Centre for Conservation Science, Department of Zoology, University of Oxford,

539 11a Mansfield Road, Oxford, OX1 3SZ

540 <sup>9</sup> The Institute of Zoology, Zoological Society of London, Outer Circle, London NW1 4RY

541 <sup>10</sup> Yale University, New Haven, CT 06520, USA

542 <sup>11</sup> Panthera, 8 West 40th Street, 18th Floor, New York, NY 10018, USA

543 <sup>12</sup> Institut de Recherche en Ecologie Tropicale, CENAREST, BP 842 Libreville, Gabon

544 <sup>13</sup> Wildlife Conservation Society, Republic of the Congo

545 <sup>14</sup> Wildlife Biology Program, W.A. Franke College of Forestry and Conservation, University of

546 Montana, Natural Sciences Room 205, Missoula, Montana, 59812, USA

547

548 **This PDF file includes:**

549 Tables S1 to S4

550 Figures S1 to S9

551

552 **Table S1.** Species taxonomy, label descriptions and justification for species/class groups

| <b>Species class</b>   | <b>Scientific name</b>         | <b>Justification</b>                                                                  |
|------------------------|--------------------------------|---------------------------------------------------------------------------------------|
| Civet_African_Palm     | <i>Nandinia binotata</i>       | -                                                                                     |
| Gorilla                | <i>Gorilla gorilla gorilla</i> | -                                                                                     |
| Rail_Nkulengu          | <i>Himantornis haematopus</i>  | -                                                                                     |
| Guineafowl_Crested     | <i>Guttera pucherani</i>       | -                                                                                     |
| Mandrillus             | <i>Mandrillus sphinx</i>       | -                                                                                     |
| Blank                  |                                | No animal or human                                                                    |
| Buffalo_African        | <i>Cyncerus cafer nanus</i>    | -                                                                                     |
| Bird                   |                                | Any other bird                                                                        |
| Chevrotain_Water       | <i>Hymenoschus aquaticus</i>   | -                                                                                     |
| Guineafowl_Black       | <i>Agelastes niger</i>         | -                                                                                     |
| Cat_Golden             | <i>Caracal aurata</i>          | -                                                                                     |
| Pangolin               |                                | Identifies any pangolin but trained mainly on <i>Smutsia gigantea</i>                 |
| Duiker_Yellow_Backed   | <i>Cephalophus silvicultor</i> | -                                                                                     |
| Human                  | <i>Homo sapiens</i>            | -                                                                                     |
| Chimpanzee             | <i>Pan troglodytes</i>         | -                                                                                     |
| Monkey                 |                                | Any guenon, colobus or mangabey                                                       |
| Mongoose               |                                | Marsh mongoose <i>Atilax paludinosus</i> or long-nosed mongoose <i>Herpestes naso</i> |
| Rat_Giant              | <i>Cricetomys emini</i>        | -                                                                                     |
| Duiker_Red             | <i>Cephalophus</i> sp.         | Any of the red <i>Cephalophus</i> sp. duikers                                         |
| Duiker_Blue            | <i>Philantomba monticola</i>   | -                                                                                     |
| Hog_Red_River          | <i>Potamochoerus porcus</i>    | -                                                                                     |
| Squirrel               |                                | Any squirrel but most training data are <i>Protoxerus stangeri</i>                    |
| Leopard_African        | <i>Panthera pardus</i>         | -                                                                                     |
| Elephant_African       | <i>Loxodonta cyclotis</i>      | -                                                                                     |
| Porcupine_Brush_Tailed | <i>Atherurus africanus</i>     | -                                                                                     |
| Genet                  | <i>Genetta</i> sp.             | Most training data are <i>Genetta servalina</i>                                       |
| Mongoose_Black_Footed  | <i>Bdeogale nigripes</i>       | -                                                                                     |

553

554

555 **Table S2.** Measures of precision, accuracy and prevalence (%s) for the 27 species/groups (see Table S1  
556 for further details on species groups) in the out-of-sample test data.

| <b>Species class</b>   | <b>Precision</b> | <b>Recall</b> | <b>F1</b> | <b>Prevalence</b> | <b>Balanced Accuracy</b> |
|------------------------|------------------|---------------|-----------|-------------------|--------------------------|
| Bird                   | 6.4              | 35.6          | 10.9      | 0.3               | 67                       |
| Blank                  | 96.3             | 31.2          | 47.1      | 13.1              | 65.5                     |
| Buffalo_African        | 90.6             | 43.3          | 58.6      | 1.6               | 71.6                     |
| Cat_Golden             | 86.5             | 68.1          | 76.2      | 1.1               | 84                       |
| Chevrotain_Water       | 96.2             | 37.3          | 53.8      | 0.6               | 68.7                     |
| Chimpanzee             | 65.3             | 74.5          | 69.6      | 2.4               | 86.8                     |
| Civet_African_Palm     | 9.1              | 100           | 16.7      | < 0.1             | 100                      |
| Duiker_Blue            | 73.1             | 91.3          | 81.2      | 14.9              | 92.7                     |
| Duiker_Red             | 87.5             | 91.8          | 89.6      | 26                | 93.6                     |
| Duiker_Yellow_Backed   | 88.7             | 71.2          | 79        | 2.9               | 85.5                     |
| Elephant_African       | 83               | 95            | 88.6      | 15.9              | 95.6                     |
| Genet                  | 87.3             | 93.8          | 90.4      | 0.7               | 96.8                     |
| Gorilla                | 50               | 15.7          | 23.9      | 0.8               | 57.8                     |
| Guineafowl_Black       | 22.1             | 60.4          | 32.3      | 0.2               | 80                       |
| Guineafowl_Crested     | 100              | 16.1          | 27.8      | 0.1               | 58.1                     |
| Hog_Red_River          | 89.9             | 89.6          | 89.8      | 5.9               | 94.5                     |
| Human                  | 51.5             | 79.9          | 62.6      | 3.6               | 88.6                     |
| Leopard_African        | 87               | 85.9          | 86.4      | 2                 | 92.8                     |
| Mandrillus             | 73.5             | 26.1          | 38.6      | 2.7               | 62.9                     |
| Mongoose               | 48.2             | 80.4          | 60.3      | 0.4               | 90                       |
| Mongoose_Black_Footed  | 72.5             | 64.4          | 68.2      | 0.2               | 82.2                     |
| Monkey                 | 59.9             | 81            | 68.9      | 2.9               | 89.7                     |
| Pangolin               | 76.7             | 62.2          | 68.7      | 0.2               | 81.1                     |
| Porcupine_Brush_Tailed | 86.6             | 83.3          | 84.9      | 0.6               | 91.6                     |
| Rail_Nkulengu          | 0                | 0             | 0         | 0                 | 50                       |
| Rat_Giant              | 39               | 88.5          | 54.1      | 0.1               | 94.2                     |
| Squirrel               | 59.9             | 78.2          | 67.8      | 1                 | 88.8                     |

557

558

559 **Table S3.** Precision, recall, F1 score and prevalence (%) for the 27 species/groups (see Table S1 for  
 560 further details on species groups) in the out-of-sample test data at all thresholds used (10 – 90% confi-  
 561 dence).

| Species class          | Threshold | Precision | Recall | F1    | Prevalence | Balanced Accuracy |
|------------------------|-----------|-----------|--------|-------|------------|-------------------|
| Bird                   | 10        | 0.064     | 0.356  | 0.109 | 0.003      | 0.670             |
| Blank                  | 10        | 0.963     | 0.312  | 0.471 | 0.131      | 0.655             |
| Buffalo_African        | 10        | 0.906     | 0.433  | 0.586 | 0.016      | 0.716             |
| Cat_Golden             | 10        | 0.865     | 0.681  | 0.762 | 0.011      | 0.840             |
| Chevrotain_Water       | 10        | 0.962     | 0.373  | 0.538 | 0.006      | 0.687             |
| Chimpanzee             | 10        | 0.653     | 0.745  | 0.696 | 0.024      | 0.868             |
| Civet_African_Palm     | 10        | 0.091     | 1.000  | 0.167 | 0.000      | 1.000             |
| Duiker_Blue            | 10        | 0.731     | 0.913  | 0.812 | 0.149      | 0.927             |
| Duiker_Red             | 10        | 0.875     | 0.918  | 0.896 | 0.260      | 0.936             |
| Duiker_Yellow_Backed   | 10        | 0.887     | 0.712  | 0.790 | 0.029      | 0.855             |
| Elephant_African       | 10        | 0.830     | 0.950  | 0.886 | 0.159      | 0.956             |
| Genet                  | 10        | 0.873     | 0.938  | 0.904 | 0.007      | 0.968             |
| Gorilla                | 10        | 0.500     | 0.157  | 0.239 | 0.008      | 0.578             |
| Guineafowl_Black       | 10        | 0.221     | 0.604  | 0.323 | 0.002      | 0.800             |
| Guineafowl_Crested     | 10        | 1.000     | 0.161  | 0.278 | 0.001      | 0.581             |
| Hog_Red_River          | 10        | 0.899     | 0.896  | 0.898 | 0.059      | 0.945             |
| Human                  | 10        | 0.515     | 0.799  | 0.626 | 0.036      | 0.886             |
| Leopard_African        | 10        | 0.870     | 0.859  | 0.864 | 0.020      | 0.928             |
| Mandrillus             | 10        | 0.735     | 0.261  | 0.386 | 0.027      | 0.629             |
| Mongoose               | 10        | 0.482     | 0.804  | 0.603 | 0.004      | 0.900             |
| Mongoose_Black_Footed  | 10        | 0.725     | 0.644  | 0.682 | 0.002      | 0.822             |
| Monkey                 | 10        | 0.599     | 0.810  | 0.689 | 0.029      | 0.897             |
| Pangolin               | 10        | 0.767     | 0.622  | 0.687 | 0.002      | 0.811             |
| Porcupine_Brush_Tailed | 10        | 0.866     | 0.833  | 0.849 | 0.006      | 0.916             |
| Rail_Nkulengu          | 10        | 0.000     | 0.000  | NA    | 0.000      | 0.500             |
| Rat_Giant              | 10        | 0.390     | 0.885  | 0.541 | 0.001      | 0.942             |
| Squirrel               | 10        | 0.599     | 0.782  | 0.678 | 0.010      | 0.888             |
| Bird                   | 20        | 0.063     | 0.352  | 0.107 | 0.003      | 0.668             |
| Blank                  | 20        | 0.966     | 0.316  | 0.476 | 0.128      | 0.657             |
| Buffalo_African        | 20        | 0.906     | 0.433  | 0.586 | 0.016      | 0.716             |
| Cat_Golden             | 20        | 0.865     | 0.688  | 0.767 | 0.011      | 0.844             |
| Chevrotain_Water       | 20        | 0.961     | 0.380  | 0.544 | 0.005      | 0.690             |
| Chimpanzee             | 20        | 0.659     | 0.745  | 0.699 | 0.024      | 0.868             |
| Civet_African_Palm     | 20        | 0.111     | 1.000  | 0.200 | 0.000      | 1.000             |
| Duiker_Blue            | 20        | 0.734     | 0.915  | 0.814 | 0.149      | 0.928             |
| Duiker_Red             | 20        | 0.877     | 0.919  | 0.898 | 0.261      | 0.937             |
| Duiker_Yellow_Backed   | 20        | 0.888     | 0.714  | 0.792 | 0.029      | 0.856             |
| Elephant_African       | 20        | 0.830     | 0.951  | 0.886 | 0.160      | 0.957             |
| Genet                  | 20        | 0.893     | 0.938  | 0.915 | 0.007      | 0.969             |
| Gorilla                | 20        | 0.482     | 0.148  | 0.227 | 0.008      | 0.574             |
| Guineafowl_Black       | 20        | 0.225     | 0.604  | 0.328 | 0.002      | 0.800             |
| Guineafowl_Crested     | 20        | 1.000     | 0.161  | 0.278 | 0.001      | 0.581             |
| Hog_Red_River          | 20        | 0.900     | 0.896  | 0.898 | 0.059      | 0.945             |
| Human                  | 20        | 0.524     | 0.800  | 0.633 | 0.036      | 0.886             |
| Leopard_African        | 20        | 0.872     | 0.861  | 0.866 | 0.020      | 0.929             |
| Mandrillus             | 20        | 0.735     | 0.263  | 0.388 | 0.027      | 0.630             |
| Mongoose               | 20        | 0.516     | 0.804  | 0.628 | 0.004      | 0.900             |



| <b>Species class</b>   | <b>Threshold</b> | <b>Precision</b> | <b>Recall</b> | <b>F1</b> | <b>Prevalence</b> | <b>Balanced Accuracy</b> |
|------------------------|------------------|------------------|---------------|-----------|-------------------|--------------------------|
| Mongoose_Black_Footed  | 20               | 0.763            | 0.674         | 0.716     | 0.002             | 0.837                    |
| Monkey                 | 20               | 0.601            | 0.814         | 0.691     | 0.029             | 0.899                    |
| Pangolin               | 20               | 0.821            | 0.622         | 0.708     | 0.002             | 0.811                    |
| Porcupine_Brush_Tailed | 20               | 0.866            | 0.853         | 0.859     | 0.005             | 0.926                    |
| Rail_Nkulengu          | 20               | 0.000            | 0.000         | NA        | 0.000             | 0.500                    |
| Rat_Giant              | 20               | 0.386            | 0.880         | 0.537     | 0.001             | 0.939                    |
| Squirrel               | 20               | 0.608            | 0.782         | 0.684     | 0.010             | 0.888                    |
| Bird                   | 30               | 0.065            | 0.377         | 0.111     | 0.003             | 0.681                    |
| Blank                  | 30               | 0.968            | 0.329         | 0.491     | 0.112             | 0.664                    |
| Buffalo_African        | 30               | 0.911            | 0.446         | 0.599     | 0.016             | 0.722                    |
| Cat_Golden             | 30               | 0.885            | 0.708         | 0.787     | 0.011             | 0.853                    |
| Chevrotain_Water       | 30               | 0.980            | 0.403         | 0.571     | 0.005             | 0.702                    |
| Chimpanzee             | 30               | 0.683            | 0.762         | 0.720     | 0.024             | 0.876                    |
| Civet_African_Palm     | 30               | 0.200            | 1.000         | 0.333     | 0.000             | 1.000                    |
| Duiker_Blue            | 30               | 0.754            | 0.921         | 0.829     | 0.152             | 0.934                    |
| Duiker_Red             | 30               | 0.888            | 0.922         | 0.905     | 0.268             | 0.940                    |
| Duiker_Yellow_Backed   | 30               | 0.909            | 0.726         | 0.807     | 0.029             | 0.862                    |
| Elephant_African       | 30               | 0.840            | 0.955         | 0.894     | 0.164             | 0.960                    |
| Genet                  | 30               | 0.904            | 0.950         | 0.926     | 0.007             | 0.974                    |
| Gorilla                | 30               | 0.519            | 0.153         | 0.237     | 0.008             | 0.576                    |
| Guineafowl_Black       | 30               | 0.283            | 0.604         | 0.386     | 0.002             | 0.800                    |
| Guineafowl_Crested     | 30               | 1.000            | 0.161         | 0.278     | 0.001             | 0.581                    |
| Hog_Red_River          | 30               | 0.911            | 0.902         | 0.907     | 0.061             | 0.948                    |
| Human                  | 30               | 0.551            | 0.802         | 0.653     | 0.037             | 0.888                    |
| Leopard_African        | 30               | 0.887            | 0.872         | 0.879     | 0.020             | 0.935                    |
| Mandrillus             | 30               | 0.764            | 0.266         | 0.395     | 0.026             | 0.632                    |
| Mongoose               | 30               | 0.599            | 0.828         | 0.695     | 0.004             | 0.913                    |
| Mongoose_Black_Footed  | 30               | 0.763            | 0.829         | 0.795     | 0.002             | 0.914                    |
| Monkey                 | 30               | 0.612            | 0.831         | 0.705     | 0.029             | 0.908                    |
| Pangolin               | 30               | 0.815            | 0.667         | 0.733     | 0.001             | 0.833                    |
| Porcupine_Brush_Tailed | 30               | 0.858            | 0.858         | 0.858     | 0.005             | 0.929                    |
| Rail_Nkulengu          | 30               | 0.000            | 0.000         | NA        | 0.000             | 0.500                    |
| Rat_Giant              | 30               | 0.449            | 0.917         | 0.603     | 0.001             | 0.958                    |
| Squirrel               | 30               | 0.645            | 0.801         | 0.715     | 0.010             | 0.898                    |
| Bird                   | 40               | 0.078            | 0.423         | 0.132     | 0.002             | 0.706                    |
| Blank                  | 40               | 0.976            | 0.352         | 0.518     | 0.090             | 0.676                    |
| Buffalo_African        | 40               | 0.929            | 0.473         | 0.627     | 0.015             | 0.736                    |
| Cat_Golden             | 40               | 0.905            | 0.722         | 0.803     | 0.011             | 0.860                    |
| Chevrotain_Water       | 40               | 0.977            | 0.452         | 0.618     | 0.004             | 0.726                    |
| Chimpanzee             | 40               | 0.725            | 0.788         | 0.755     | 0.024             | 0.890                    |
| Civet_African_Palm     | 40               | 0.200            | 1.000         | 0.333     | 0.000             | 1.000                    |
| Duiker_Blue            | 40               | 0.791            | 0.934         | 0.857     | 0.157             | 0.944                    |
| Duiker_Red             | 40               | 0.904            | 0.930         | 0.917     | 0.279             | 0.946                    |
| Duiker_Yellow_Backed   | 40               | 0.924            | 0.751         | 0.829     | 0.030             | 0.875                    |
| Elephant_African       | 40               | 0.860            | 0.962         | 0.908     | 0.170             | 0.965                    |
| Genet                  | 40               | 0.921            | 0.950         | 0.935     | 0.007             | 0.975                    |
| Gorilla                | 40               | 0.528            | 0.119         | 0.195     | 0.007             | 0.559                    |
| Guineafowl_Black       | 40               | 0.375            | 0.600         | 0.462     | 0.002             | 0.799                    |
| Guineafowl_Crested     | 40               | 1.000            | 0.161         | 0.278     | 0.001             | 0.581                    |
| Hog_Red_River          | 40               | 0.930            | 0.911         | 0.920     | 0.063             | 0.953                    |
| Human                  | 40               | 0.593            | 0.811         | 0.685     | 0.038             | 0.895                    |
| Leopard_African        | 40               | 0.897            | 0.903         | 0.900     | 0.020             | 0.951                    |
| Mandrillus             | 40               | 0.795            | 0.288         | 0.422     | 0.025             | 0.643                    |
| Mongoose               | 40               | 0.704            | 0.835         | 0.764     | 0.004             | 0.917                    |

| <b>Species class</b>   | <b>Threshold</b> | <b>Precision</b> | <b>Recall</b> | <b>F1</b> | <b>Prevalence</b> | <b>Balanced Accuracy</b> |
|------------------------|------------------|------------------|---------------|-----------|-------------------|--------------------------|
| Mongoose_Black_Footed  | 40               | 0.800            | 0.903         | 0.848     | 0.001             | 0.951                    |
| Monkey                 | 40               | 0.632            | 0.856         | 0.727     | 0.029             | 0.920                    |
| Pangolin               | 40               | 0.880            | 0.733         | 0.800     | 0.001             | 0.867                    |
| Porcupine_Brush_Tailed | 40               | 0.888            | 0.904         | 0.896     | 0.005             | 0.951                    |
| Rail_Nkulengu          | 40               | 0.000            | 0.000         | NA        | 0.000             | 0.500                    |
| Rat_Giant              | 40               | 0.537            | 0.917         | 0.677     | 0.001             | 0.958                    |
| Squirrel               | 40               | 0.715            | 0.843         | 0.774     | 0.010             | 0.920                    |
| Bird                   | 50               | 0.084            | 0.450         | 0.142     | 0.002             | 0.720                    |
| Blank                  | 50               | 0.981            | 0.378         | 0.546     | 0.072             | 0.689                    |
| Buffalo_African        | 50               | 0.938            | 0.503         | 0.655     | 0.014             | 0.751                    |
| Cat_Golden             | 50               | 0.923            | 0.741         | 0.822     | 0.011             | 0.870                    |
| Chevrotain_Water       | 50               | 0.974            | 0.500         | 0.661     | 0.004             | 0.750                    |
| Chimpanzee             | 50               | 0.753            | 0.824         | 0.787     | 0.024             | 0.909                    |
| Civet_African_Palm     | 50               | 0.500            | 1.000         | 0.667     | 0.000             | 1.000                    |
| Duiker_Blue            | 50               | 0.825            | 0.945         | 0.881     | 0.162             | 0.953                    |
| Duiker_Red             | 50               | 0.920            | 0.939         | 0.930     | 0.288             | 0.953                    |
| Duiker_Yellow_Backed   | 50               | 0.942            | 0.773         | 0.849     | 0.029             | 0.886                    |
| Elephant_African       | 50               | 0.879            | 0.968         | 0.921     | 0.177             | 0.969                    |
| Genet                  | 50               | 0.932            | 0.962         | 0.947     | 0.008             | 0.981                    |
| Gorilla                | 50               | 0.583            | 0.107         | 0.181     | 0.006             | 0.553                    |
| Guineafowl_Black       | 50               | 0.492            | 0.638         | 0.556     | 0.002             | 0.818                    |
| Guineafowl_Crested     | 50               | 1.000            | 0.138         | 0.242     | 0.001             | 0.569                    |
| Hog_Red_River          | 50               | 0.946            | 0.922         | 0.934     | 0.064             | 0.959                    |
| Human                  | 50               | 0.646            | 0.827         | 0.725     | 0.039             | 0.904                    |
| Leopard_African        | 50               | 0.902            | 0.921         | 0.912     | 0.021             | 0.959                    |
| Mandrillus             | 50               | 0.816            | 0.292         | 0.430     | 0.023             | 0.645                    |
| Mongoose               | 50               | 0.775            | 0.868         | 0.819     | 0.004             | 0.934                    |
| Mongoose_Black_Footed  | 50               | 0.903            | 0.933         | 0.918     | 0.001             | 0.967                    |
| Monkey                 | 50               | 0.654            | 0.879         | 0.750     | 0.029             | 0.932                    |
| Pangolin               | 50               | 0.913            | 0.724         | 0.808     | 0.001             | 0.862                    |
| Porcupine_Brush_Tailed | 50               | 0.902            | 0.953         | 0.927     | 0.005             | 0.976                    |
| Rail_Nkulengu          | 50               | 0.000            | 0.000         | NA        | 0.000             | 0.500                    |
| Rat_Giant              | 50               | 0.625            | 0.909         | 0.741     | 0.001             | 0.954                    |
| Squirrel               | 50               | 0.758            | 0.888         | 0.818     | 0.010             | 0.943                    |
| Bird                   | 60               | 0.103            | 0.552         | 0.174     | 0.002             | 0.772                    |
| Blank                  | 60               | 0.985            | 0.399         | 0.568     | 0.052             | 0.699                    |
| Buffalo_African        | 60               | 0.957            | 0.545         | 0.694     | 0.013             | 0.772                    |
| Cat_Golden             | 60               | 0.935            | 0.768         | 0.844     | 0.011             | 0.884                    |
| Chevrotain_Water       | 60               | 0.970            | 0.582         | 0.727     | 0.003             | 0.791                    |
| Chimpanzee             | 60               | 0.809            | 0.848         | 0.828     | 0.023             | 0.921                    |
| Civet_African_Palm     | 60               | 0.500            | 1.000         | 0.667     | 0.000             | 1.000                    |
| Duiker_Blue            | 60               | 0.870            | 0.960         | 0.912     | 0.169             | 0.965                    |
| Duiker_Red             | 60               | 0.943            | 0.952         | 0.948     | 0.298             | 0.964                    |
| Duiker_Yellow_Backed   | 60               | 0.962            | 0.802         | 0.875     | 0.029             | 0.901                    |
| Elephant_African       | 60               | 0.897            | 0.975         | 0.934     | 0.186             | 0.975                    |
| Genet                  | 60               | 0.943            | 0.980         | 0.961     | 0.008             | 0.990                    |
| Gorilla                | 60               | 0.583            | 0.065         | 0.118     | 0.006             | 0.533                    |
| Guineafowl_Black       | 60               | 0.614            | 0.711         | 0.659     | 0.002             | 0.855                    |
| Guineafowl_Crested     | 60               | 1.000            | 0.087         | 0.160     | 0.001             | 0.543                    |
| Hog_Red_River          | 60               | 0.962            | 0.942         | 0.952     | 0.065             | 0.970                    |
| Human                  | 60               | 0.714            | 0.850         | 0.777     | 0.039             | 0.918                    |
| Leopard_African        | 60               | 0.916            | 0.945         | 0.930     | 0.022             | 0.971                    |
| Mandrillus             | 60               | 0.809            | 0.276         | 0.411     | 0.021             | 0.637                    |
| Mongoose               | 60               | 0.794            | 0.895         | 0.842     | 0.004             | 0.947                    |

| Species class          | Threshold | Precision | Recall | F1    | Prevalence | Balanced Accuracy |
|------------------------|-----------|-----------|--------|-------|------------|-------------------|
| Mongoose_Black_Footed  | 60        | 0.900     | 1.000  | 0.947 | 0.001      | 1.000             |
| Monkey                 | 60        | 0.680     | 0.898  | 0.774 | 0.029      | 0.942             |
| Pangolin               | 60        | 0.905     | 0.731  | 0.809 | 0.001      | 0.865             |
| Porcupine_Brush_Tailed | 60        | 0.923     | 0.970  | 0.946 | 0.005      | 0.985             |
| Rail_Nkulengu          | 60        | 0.000     | 0.000  | NA    | 0.000      | 0.500             |
| Rat_Giant              | 60        | 0.633     | 0.950  | 0.760 | 0.001      | 0.975             |
| Squirrel               | 60        | 0.810     | 0.938  | 0.869 | 0.009      | 0.968             |
| Bird                   | 70        | 0.112     | 0.600  | 0.189 | 0.001      | 0.797             |
| Blank                  | 70        | 0.981     | 0.403  | 0.571 | 0.036      | 0.701             |
| Buffalo_African        | 70        | 0.975     | 0.557  | 0.709 | 0.012      | 0.778             |
| Cat_Golden             | 70        | 0.960     | 0.780  | 0.861 | 0.010      | 0.890             |
| Chevrotain_Water       | 70        | 1.000     | 0.674  | 0.806 | 0.002      | 0.837             |
| Chimpanzee             | 70        | 0.835     | 0.884  | 0.859 | 0.022      | 0.940             |
| Civet_African_Palm     | 70        | NA        | NA     | NA    | 0.000      | NA                |
| Duiker_Blue            | 70        | 0.904     | 0.970  | 0.936 | 0.176      | 0.974             |
| Duiker_Red             | 70        | 0.959     | 0.965  | 0.962 | 0.308      | 0.973             |
| Duiker_Yellow_Backed   | 70        | 0.975     | 0.838  | 0.902 | 0.029      | 0.919             |
| Elephant_African       | 70        | 0.919     | 0.984  | 0.951 | 0.193      | 0.982             |
| Genet                  | 70        | 0.953     | 0.993  | 0.972 | 0.008      | 0.996             |
| Gorilla                | 70        | 0.000     | 0.000  | NA    | 0.004      | 0.500             |
| Guineafowl_Black       | 70        | 0.706     | 0.727  | 0.716 | 0.002      | 0.863             |
| Guineafowl_Crested     | 70        | 1.000     | 0.053  | 0.100 | 0.001      | 0.526             |
| Hog_Red_River          | 70        | 0.970     | 0.957  | 0.963 | 0.065      | 0.977             |
| Human                  | 70        | 0.784     | 0.874  | 0.826 | 0.040      | 0.932             |
| Leopard_African        | 70        | 0.928     | 0.960  | 0.944 | 0.022      | 0.979             |
| Mandrillus             | 70        | 0.839     | 0.290  | 0.431 | 0.018      | 0.645             |
| Mongoose               | 70        | 0.835     | 0.910  | 0.871 | 0.004      | 0.955             |
| Mongoose_Black_Footed  | 70        | 0.929     | 1.000  | 0.963 | 0.001      | 1.000             |
| Monkey                 | 70        | 0.707     | 0.920  | 0.800 | 0.029      | 0.954             |
| Pangolin               | 70        | 0.941     | 0.800  | 0.865 | 0.001      | 0.900             |
| Porcupine_Brush_Tailed | 70        | 0.939     | 0.989  | 0.963 | 0.005      | 0.994             |
| Rail_Nkulengu          | 70        | 0.000     | 0.000  | NA    | 0.000      | 0.500             |
| Rat_Giant              | 70        | 0.682     | 0.938  | 0.789 | 0.001      | 0.969             |
| Squirrel               | 70        | 0.859     | 0.958  | 0.906 | 0.009      | 0.978             |
| Bird                   | 80        | 0.151     | 0.786  | 0.253 | 0.001      | 0.891             |
| Blank                  | 80        | 0.986     | 0.363  | 0.530 | 0.023      | 0.681             |
| Buffalo_African        | 80        | 1.000     | 0.596  | 0.747 | 0.010      | 0.798             |
| Cat_Golden             | 80        | 0.962     | 0.839  | 0.896 | 0.009      | 0.919             |
| Chevrotain_Water       | 80        | 1.000     | 0.750  | 0.857 | 0.002      | 0.875             |
| Chimpanzee             | 80        | 0.875     | 0.919  | 0.897 | 0.019      | 0.958             |
| Civet_African_Palm     | 80        | NA        | NA     | NA    | 0.000      | NA                |
| Duiker_Blue            | 80        | 0.932     | 0.981  | 0.956 | 0.183      | 0.982             |
| Duiker_Red             | 80        | 0.973     | 0.975  | 0.974 | 0.315      | 0.981             |
| Duiker_Yellow_Backed   | 80        | 0.988     | 0.885  | 0.934 | 0.028      | 0.942             |
| Elephant_African       | 80        | 0.940     | 0.991  | 0.965 | 0.203      | 0.987             |
| Genet                  | 80        | 0.949     | 1.000  | 0.974 | 0.008      | 1.000             |
| Gorilla                | 80        | 0.000     | 0.000  | NA    | 0.003      | 0.500             |
| Guineafowl_Black       | 80        | 0.769     | 0.690  | 0.727 | 0.002      | 0.845             |
| Guineafowl_Crested     | 80        | 1.000     | 0.067  | 0.125 | 0.001      | 0.533             |
| Hog_Red_River          | 80        | 0.980     | 0.971  | 0.975 | 0.065      | 0.985             |
| Human                  | 80        | 0.853     | 0.892  | 0.872 | 0.040      | 0.943             |
| Leopard_African        | 80        | 0.952     | 0.974  | 0.963 | 0.023      | 0.987             |
| Mandrillus             | 80        | 0.888     | 0.305  | 0.454 | 0.014      | 0.652             |
| Mongoose               | 80        | 0.829     | 0.944  | 0.883 | 0.004      | 0.972             |

| <b>Species class</b>   | <b>Threshold</b> | <b>Precision</b> | <b>Recall</b> | <b>F1</b> | <b>Prevalence</b> | <b>Balanced Accuracy</b> |
|------------------------|------------------|------------------|---------------|-----------|-------------------|--------------------------|
| Mongoose_Black_Footed  | 80               | 1.000            | 1.000         | 1.000     | 0.001             | 1.000                    |
| Monkey                 | 80               | 0.756            | 0.928         | 0.833     | 0.029             | 0.959                    |
| Pangolin               | 80               | 1.000            | 0.824         | 0.903     | 0.001             | 0.912                    |
| Porcupine_Brush_Tailed | 80               | 0.935            | 0.989         | 0.961     | 0.005             | 0.994                    |
| Rail_Nkulengu          | 80               | NA               | NA            | NA        | 0.000             | NA                       |
| Rat_Giant              | 80               | 0.737            | 0.933         | 0.824     | 0.001             | 0.967                    |
| Squirrel               | 80               | 0.879            | 0.979         | 0.926     | 0.008             | 0.989                    |
| Bird                   | 90               | 0.220            | 0.900         | 0.353     | 0.001             | 0.949                    |
| Blank                  | 90               | 1.000            | 0.320         | 0.484     | 0.011             | 0.660                    |
| Buffalo_African        | 90               | 1.000            | 0.647         | 0.785     | 0.008             | 0.823                    |
| Cat_Golden             | 90               | 0.980            | 0.897         | 0.937     | 0.007             | 0.949                    |
| Chevrotain_Water       | 90               | 1.000            | 0.833         | 0.909     | 0.001             | 0.917                    |
| Chimpanzee             | 90               | 0.914            | 0.922         | 0.918     | 0.016             | 0.960                    |
| Civet_African_Palm     | 90               | NA               | NA            | NA        | 0.000             | NA                       |
| Duiker_Blue            | 90               | 0.957            | 0.990         | 0.973     | 0.196             | 0.989                    |
| Duiker_Red             | 90               | 0.984            | 0.984         | 0.984     | 0.317             | 0.988                    |
| Duiker_Yellow_Backed   | 90               | 0.994            | 0.912         | 0.952     | 0.026             | 0.956                    |
| Elephant_African       | 90               | 0.961            | 0.994         | 0.977     | 0.218             | 0.991                    |
| Genet                  | 90               | 0.957            | 1.000         | 0.978     | 0.007             | 1.000                    |
| Gorilla                | 90               | NA               | 0.000         | NA        | 0.002             | 0.500                    |
| Guineafowl_Black       | 90               | 0.864            | 0.826         | 0.844     | 0.002             | 0.913                    |
| Guineafowl_Crested     | 90               | NA               | 0.000         | NA        | 0.001             | 0.500                    |
| Hog_Red_River          | 90               | 0.986            | 0.982         | 0.984     | 0.063             | 0.990                    |
| Human                  | 90               | 0.918            | 0.923         | 0.920     | 0.040             | 0.960                    |
| Leopard_African        | 90               | 0.973            | 0.979         | 0.976     | 0.025             | 0.989                    |
| Mandrillus             | 90               | 0.900            | 0.298         | 0.448     | 0.010             | 0.649                    |
| Mongoose               | 90               | 0.855            | 0.967         | 0.908     | 0.004             | 0.983                    |
| Mongoose_Black_Footed  | 90               | 1.000            | 1.000         | 1.000     | 0.001             | 1.000                    |
| Monkey                 | 90               | 0.811            | 0.952         | 0.876     | 0.028             | 0.973                    |
| Pangolin               | 90               | 1.000            | 0.813         | 0.897     | 0.001             | 0.906                    |
| Porcupine_Brush_Tailed | 90               | 0.934            | 1.000         | 0.966     | 0.005             | 1.000                    |
| Rail_Nkulengu          | 90               | NA               | NA            | NA        | 0.000             | NA                       |
| Rat_Giant              | 90               | 0.846            | 0.917         | 0.880     | 0.001             | 0.958                    |
| Squirrel               | 90               | 0.938            | 0.981         | 0.959     | 0.007             | 0.990                    |

562

563

564 **Table S4.** Difference in proportion of day (24 h) active for each species and threshold combination  
565 showing standard error (SE), Wald test statistic (W) and p value (p).

| Species          | Threshold | Difference | SE   | W    | p    |
|------------------|-----------|------------|------|------|------|
| Elephant_African | 0.00      | 0.08       | 0.03 | 5.97 | 0.01 |
| Leopard_African  | 0.00      | 0.16       | 0.08 | 3.99 | 0.05 |
| Cat_Golden       | 0.00      | 0.06       | 0.09 | 0.42 | 0.52 |
| Chimpanzee       | 0.00      | 0.05       | 0.03 | 2.92 | 0.09 |
| Elephant_African | 0.10      | 0.08       | 0.04 | 5.47 | 0.02 |
| Leopard_African  | 0.10      | 0.16       | 0.08 | 4.26 | 0.04 |
| Cat_Golden       | 0.10      | 0.06       | 0.09 | 0.45 | 0.50 |
| Chimpanzee       | 0.10      | 0.05       | 0.03 | 2.71 | 0.10 |
| Elephant_African | 0.20      | 0.08       | 0.03 | 6.04 | 0.01 |
| Leopard_African  | 0.20      | 0.16       | 0.08 | 4.15 | 0.04 |
| Cat_Golden       | 0.20      | 0.06       | 0.09 | 0.38 | 0.54 |
| Chimpanzee       | 0.20      | 0.04       | 0.03 | 2.33 | 0.13 |
| Elephant_African | 0.30      | 0.08       | 0.03 | 6.44 | 0.01 |
| Leopard_African  | 0.30      | 0.16       | 0.08 | 4.53 | 0.03 |
| Cat_Golden       | 0.30      | 0.04       | 0.09 | 0.20 | 0.66 |
| Chimpanzee       | 0.30      | 0.04       | 0.03 | 2.07 | 0.15 |
| Elephant_African | 0.40      | 0.07       | 0.03 | 4.15 | 0.04 |
| Leopard_African  | 0.40      | 0.16       | 0.08 | 4.08 | 0.04 |
| Cat_Golden       | 0.40      | 0.08       | 0.10 | 0.67 | 0.41 |
| Chimpanzee       | 0.40      | 0.04       | 0.03 | 1.91 | 0.17 |
| Elephant_African | 0.50      | 0.05       | 0.03 | 2.64 | 0.10 |
| Leopard_African  | 0.50      | 0.17       | 0.08 | 4.48 | 0.03 |
| Cat_Golden       | 0.50      | 0.09       | 0.09 | 0.96 | 0.33 |
| Chimpanzee       | 0.50      | 0.04       | 0.03 | 1.77 | 0.18 |
| Elephant_African | 0.60      | 0.04       | 0.03 | 1.64 | 0.20 |
| Leopard_African  | 0.60      | 0.15       | 0.08 | 3.53 | 0.06 |
| Cat_Golden       | 0.60      | 0.06       | 0.10 | 0.44 | 0.50 |
| Chimpanzee       | 0.60      | 0.04       | 0.03 | 1.52 | 0.22 |
| Elephant_African | 0.70      | 0.04       | 0.03 | 1.21 | 0.27 |
| Leopard_African  | 0.70      | 0.15       | 0.08 | 3.08 | 0.08 |
| Cat_Golden       | 0.70      | 0.10       | 0.10 | 1.00 | 0.32 |
| Chimpanzee       | 0.70      | 0.03       | 0.03 | 1.36 | 0.24 |
| Elephant_African | 0.80      | 0.03       | 0.03 | 0.69 | 0.41 |
| Leopard_African  | 0.80      | 0.16       | 0.08 | 3.86 | 0.05 |
| Cat_Golden       | 0.80      | 0.15       | 0.10 | 2.14 | 0.14 |
| Chimpanzee       | 0.80      | 0.03       | 0.03 | 0.93 | 0.33 |
| Elephant_African | 0.90      | 0.02       | 0.03 | 0.57 | 0.45 |
| Leopard_African  | 0.90      | 0.16       | 0.08 | 4.51 | 0.03 |
| Cat_Golden       | 0.90      | 0.16       | 0.10 | 2.70 | 0.10 |
| Chimpanzee       | 0.90      | 0.03       | 0.03 | 1.09 | 0.30 |

566

567

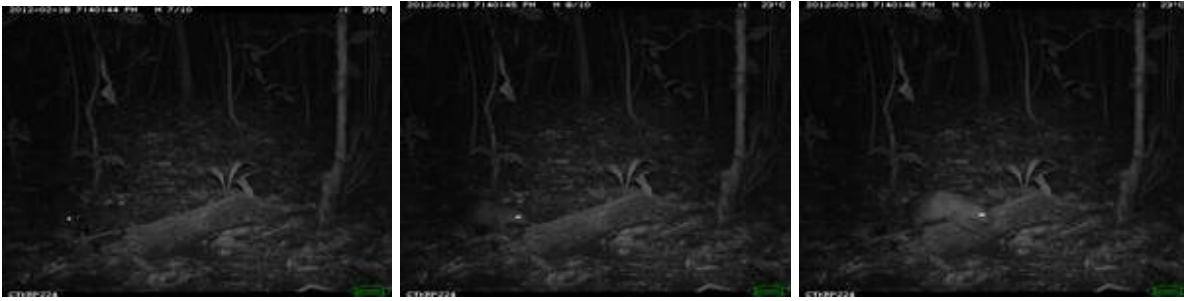

568

569 **Figure S1.** Three example photos taken from a burst of 10 images, showing a porcupine *Atherurus*

570 *africanus* walking in front of the camera.

571

572

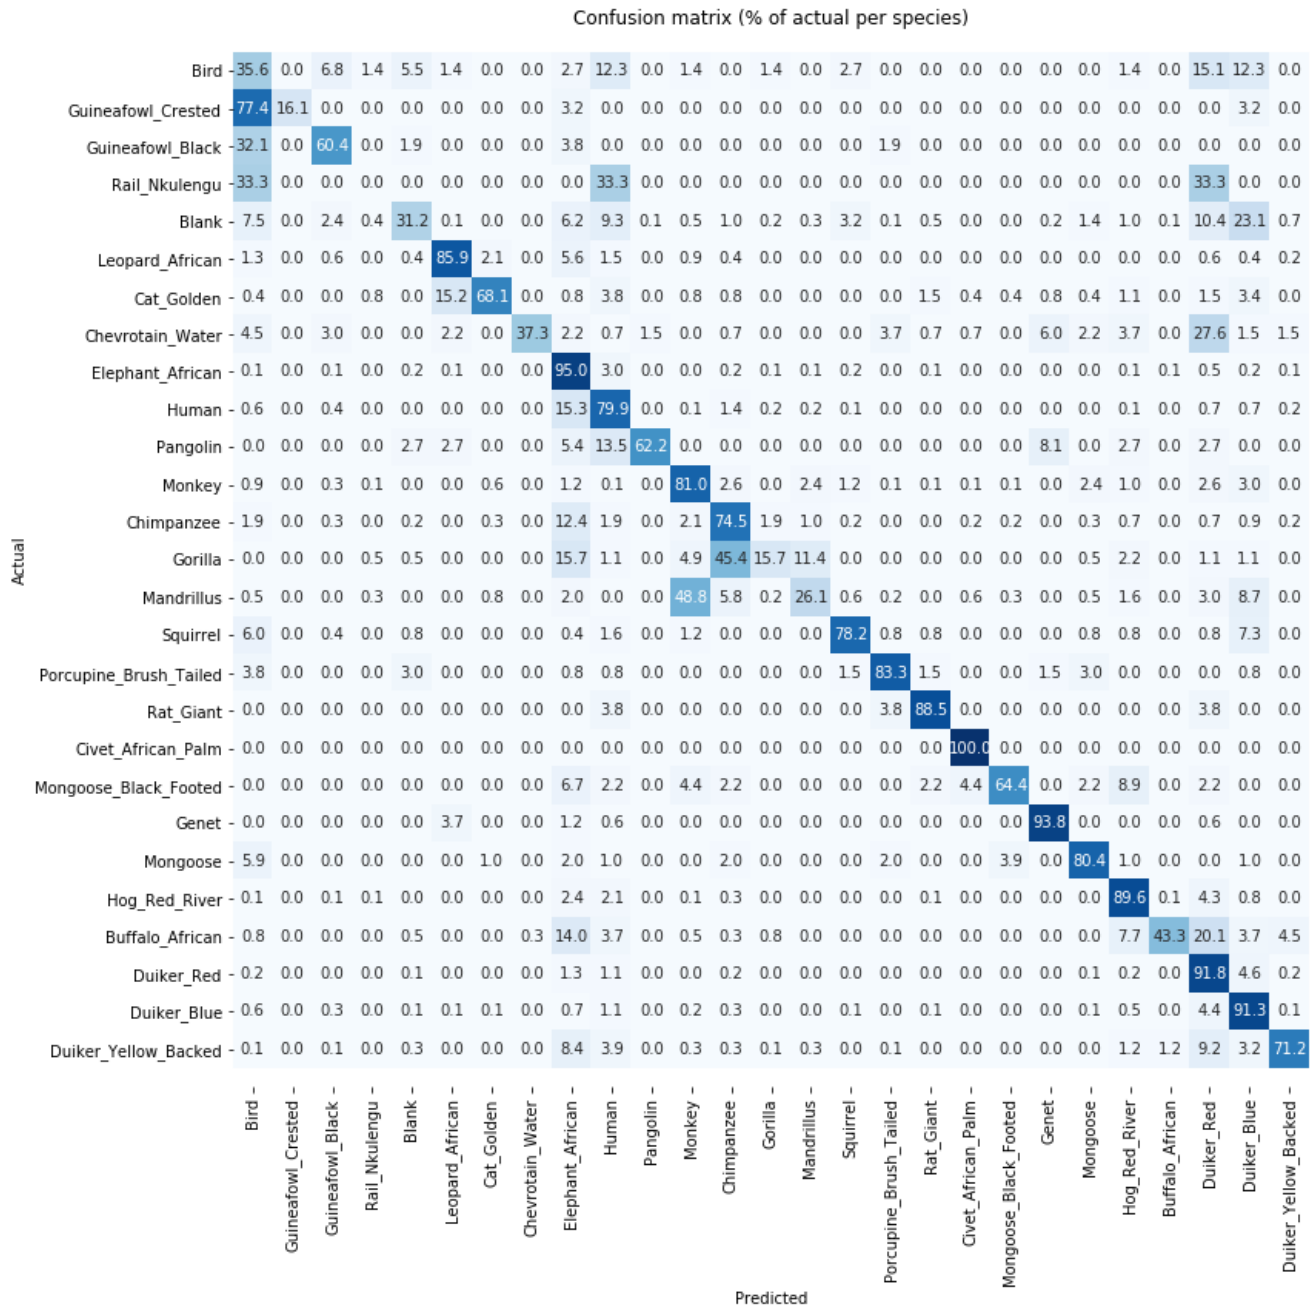

573

574 **Figure S2.** Confusion matrix showing model performance on out of sample test data (each row is  
 575 normalized independently). Figure S7 shows the confusion matrix with absolute numbers.

576

577

578

579

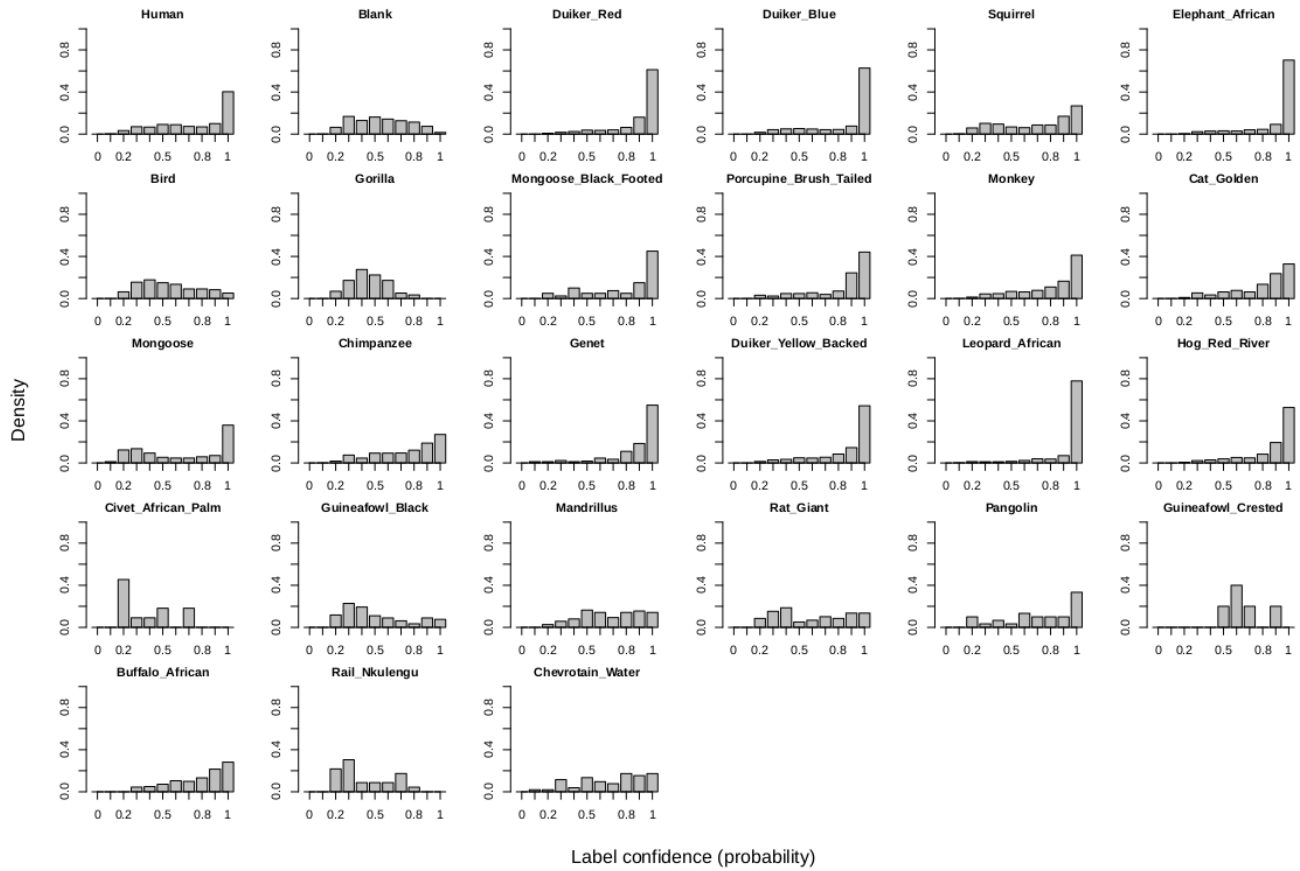



583

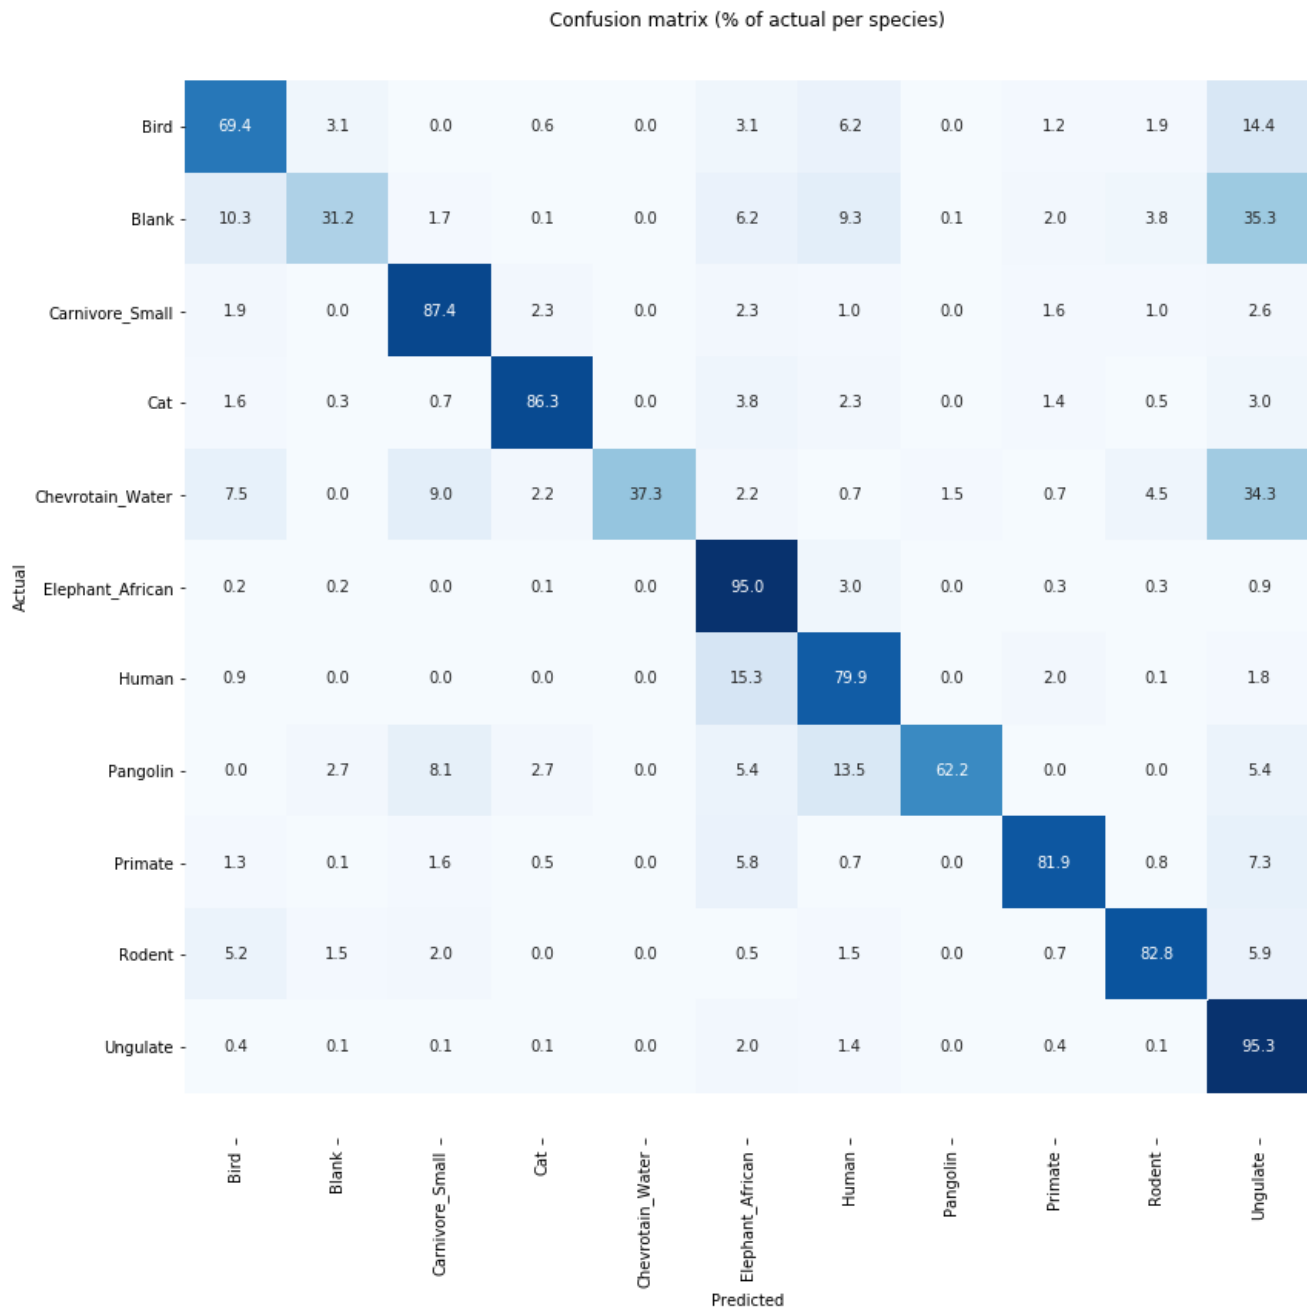

584

585 **Figure S4.** Confusion matrix showing model performance for an aggregated set of 11 classes.

586

587

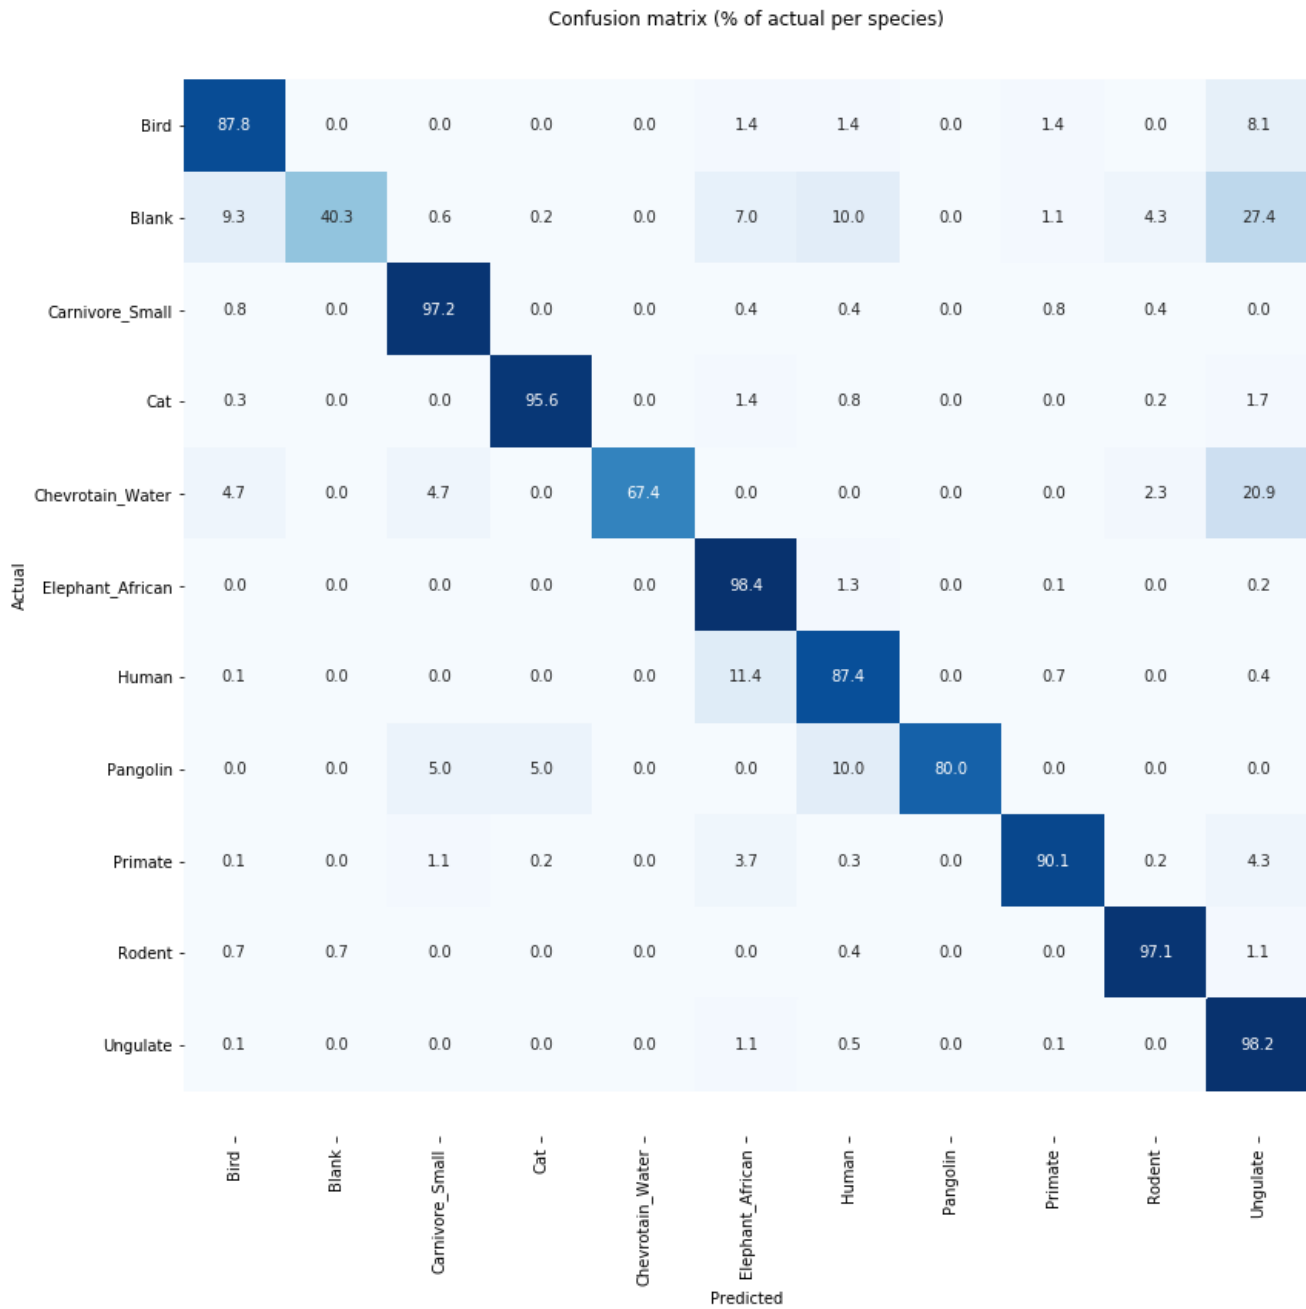

588

589 **Figure S5.** Confusion matrix showing model performance for an aggregated set of 11 classes after

590 removing labels with a predicted confidence < 70%

591

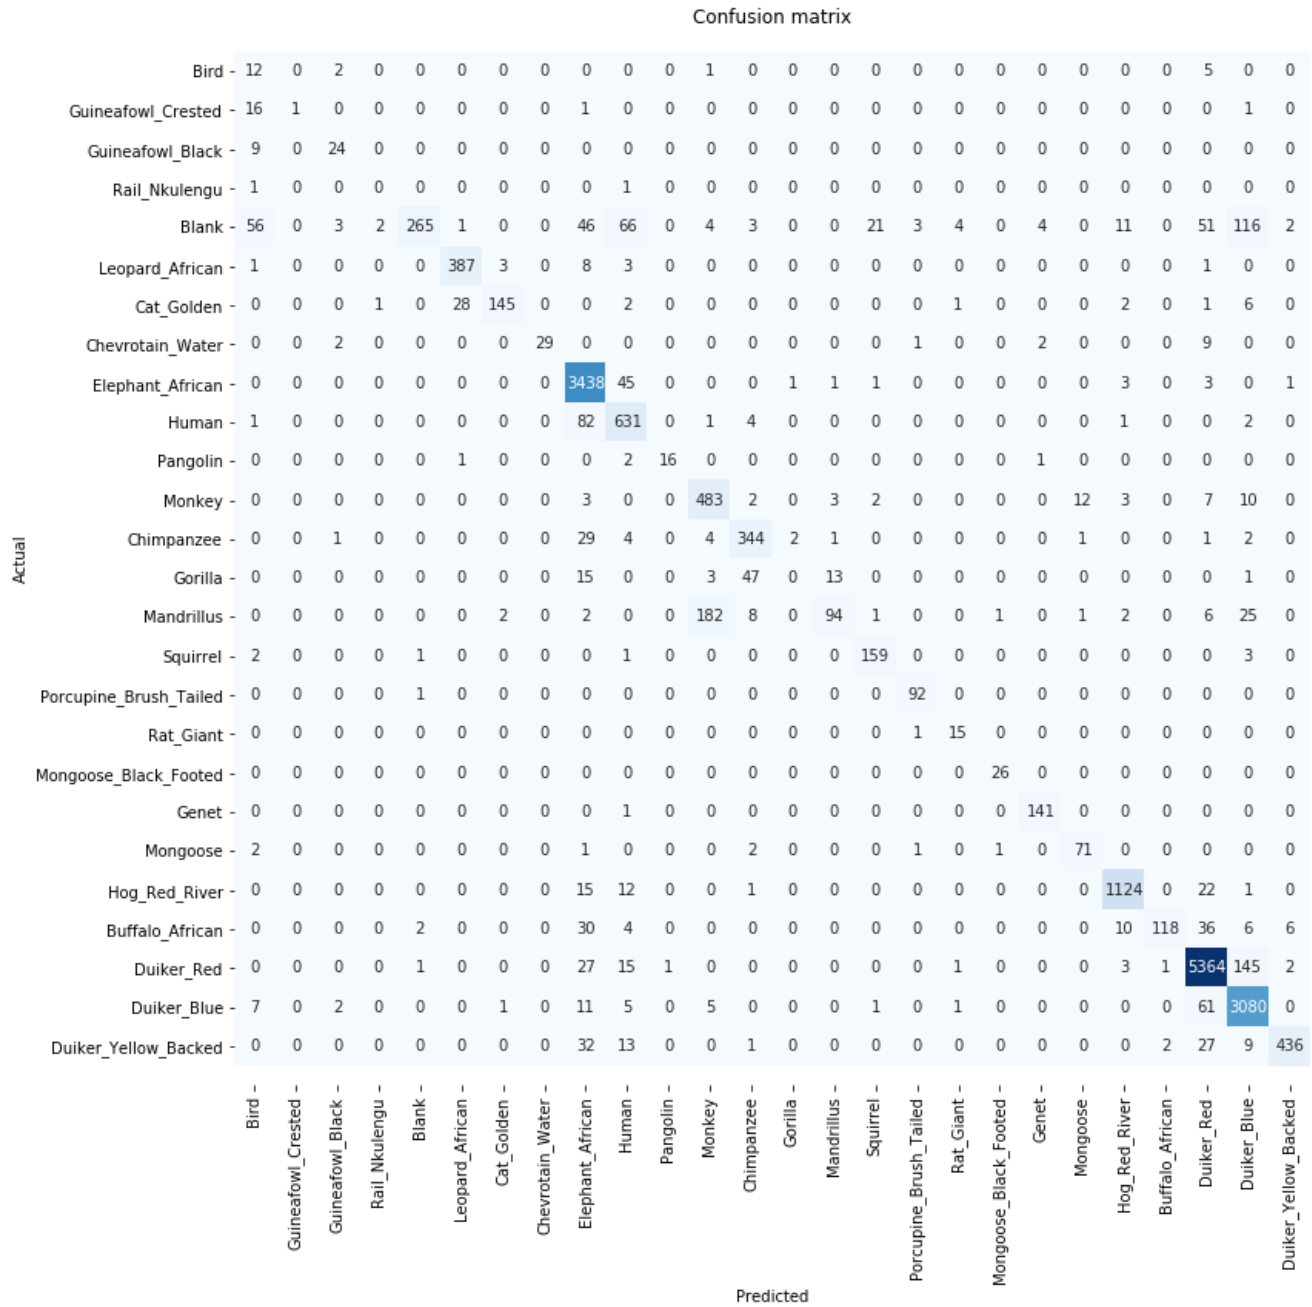

592

593 **Figure S6.** Confusion matrix showing model performance on out of sample test data after excluding  
 594 labels below a confidence threshold of 70% (with absolute numbers). Figure 3 shows the confusion  
 595 matrix with each row normalized independently.

|  |                        | Confusion matrix |                    |                  |               |       |                 |            |                  |                  |       |          |        |            |         |            |          |                        |           |                    |                       |       |          |               |                 |            |             |                      |   |
|--|------------------------|------------------|--------------------|------------------|---------------|-------|-----------------|------------|------------------|------------------|-------|----------|--------|------------|---------|------------|----------|------------------------|-----------|--------------------|-----------------------|-------|----------|---------------|-----------------|------------|-------------|----------------------|---|
|  | Bird                   | 26               | 0                  | 5                | 1             | 4     | 1               | 0          | 0                | 2                | 9     | 0        | 1      | 0          | 1       | 0          | 2        | 0                      | 0         | 0                  | 0                     | 0     | 0        | 1             | 0               | 11         | 9           | 0                    |   |
|  | Guineafowl_Crested     | 24               | 5                  | 0                | 0             | 0     | 0               | 0          | 0                | 1                | 0     | 0        | 0      | 0          | 0       | 0          | 0        | 0                      | 0         | 0                  | 0                     | 0     | 0        | 0             | 0               | 0          | 0           | 1                    | 0 |
|  | Guineafowl_Black       | 17               | 0                  | 32               | 0             | 1     | 0               | 0          | 0                | 2                | 0     | 0        | 0      | 0          | 0       | 0          | 0        | 1                      | 0         | 0                  | 0                     | 0     | 0        | 0             | 0               | 0          | 0           | 0                    | 0 |
|  | Rail_Nkulengu          | 1                | 0                  | 0                | 0             | 0     | 0               | 0          | 0                | 0                | 1     | 0        | 0      | 0          | 0       | 0          | 0        | 0                      | 0         | 0                  | 0                     | 0     | 0        | 0             | 0               | 0          | 1           | 0                    | 0 |
|  | Blank                  | 233              | 0                  | 75               | 14            | 974   | 4               | 0          | 0                | 193              | 292   | 3        | 17     | 31         | 7       | 8          | 99       | 3                      | 17        | 0                  | 1                     | 7     | 45       | 30            | 2               | 326        | 722         | 22                   |   |
|  | Leopard_African        | 6                | 0                  | 3                | 0             | 2     | 401             | 10         | 0                | 26               | 7     | 0        | 4      | 2          | 0       | 0          | 0        | 0                      | 0         | 0                  | 0                     | 0     | 0        | 0             | 0               | 3          | 2           | 1                    |   |
|  | Cat_Golden             | 1                | 0                  | 0                | 2             | 0     | 40              | 179        | 0                | 2                | 10    | 0        | 2      | 2          | 0       | 0          | 0        | 4                      | 1         | 1                  | 2                     | 1     | 3        | 0             | 4               | 9          | 0           |                      |   |
|  | Chevrotain_Water       | 6                | 0                  | 4                | 0             | 0     | 3               | 0          | 50               | 3                | 1     | 2        | 0      | 1          | 0       | 0          | 5        | 1                      | 1         | 0                  | 8                     | 3     | 5        | 0             | 37              | 2          | 2           |                      |   |
|  | Elephant_African       | 3                | 0                  | 5                | 0             | 7     | 3               | 1          | 0                | 3610             | 115   | 1        | 0      | 6          | 2       | 2          | 9        | 0                      | 2         | 0                  | 0                     | 1     | 4        | 2             | 18              | 6          | 5           |                      |   |
|  | Human                  | 5                | 0                  | 3                | 0             | 0     | 0               | 0          | 0                | 130              | 679   | 0        | 1      | 12         | 2       | 2          | 1        | 0                      | 0         | 0                  | 0                     | 1     | 0        | 6             | 6               | 6          | 2           |                      |   |
|  | Pangolin               | 0                | 0                  | 0                | 0             | 1     | 1               | 0          | 0                | 2                | 5     | 23       | 0      | 0          | 0       | 0          | 0        | 0                      | 0         | 3                  | 0                     | 1     | 0        | 1             | 0               | 0          | 0           |                      |   |
|  | Monkey                 | 6                | 0                  | 2                | 1             | 0     | 0               | 4          | 0                | 8                | 1     | 0        | 562    | 18         | 0       | 17         | 8        | 1                      | 1         | 1                  | 1                     | 0     | 17       | 7             | 0               | 18         | 21          | 0                    |   |
|  | Chimpanzee             | 11               | 0                  | 2                | 0             | 1     | 0               | 2          | 0                | 71               | 11    | 0        | 12     | 427        | 11      | 6          | 1        | 0                      | 0         | 1                  | 1                     | 0     | 2        | 4             | 0               | 4          | 5           | 1                    |   |
|  | Gorilla                | 0                | 0                  | 0                | 1             | 1     | 0               | 0          | 0                | 29               | 2     | 0        | 9      | 84         | 29      | 21         | 0        | 0                      | 0         | 0                  | 1                     | 4     | 0        | 2             | 2               | 0          | 0           |                      |   |
|  | Mandrillus             | 3                | 0                  | 0                | 2             | 0     | 0               | 5          | 0                | 13               | 0     | 0        | 310    | 37         | 1       | 166        | 4        | 1                      | 0         | 4                  | 2                     | 0     | 3        | 10            | 0               | 19         | 55          | 0                    |   |
|  | Squirrel               | 15               | 0                  | 1                | 0             | 2     | 0               | 0          | 0                | 1                | 4     | 0        | 3      | 0          | 0       | 0          | 194      | 2                      | 2         | 0                  | 0                     | 0     | 2        | 2             | 0               | 2          | 18          | 0                    |   |
|  | Porcupine_Brush_Tailed | 5                | 0                  | 0                | 0             | 4     | 0               | 0          | 0                | 1                | 1     | 0        | 0      | 0          | 0       | 2          | 110      | 2                      | 0         | 0                  | 2                     | 4     | 0        | 0             | 0               | 1          | 0           | 0                    |   |
|  | Rat_Giant              | 0                | 0                  | 0                | 0             | 0     | 0               | 0          | 0                | 0                | 1     | 0        | 0      | 0          | 0       | 0          | 1        | 23                     | 0         | 0                  | 0                     | 0     | 0        | 0             | 1               | 0          | 0           | 0                    |   |
|  | Civet_African_Palm     | 0                | 0                  | 0                | 0             | 0     | 0               | 0          | 0                | 0                | 0     | 0        | 0      | 0          | 0       | 0          | 0        | 0                      | 1         | 0                  | 0                     | 0     | 0        | 0             | 0               | 0          | 0           | 0                    |   |
|  | Mongoose_Black_Footed  | 0                | 0                  | 0                | 0             | 0     | 0               | 0          | 0                | 3                | 1     | 0        | 2      | 1          | 0       | 0          | 0        | 1                      | 2         | 29                 | 0                     | 1     | 4        | 0             | 1               | 0          | 0           | 0                    |   |
|  | Genet                  | 0                | 0                  | 0                | 0             | 0     | 6               | 0          | 0                | 2                | 1     | 0        | 0      | 0          | 0       | 0          | 0        | 0                      | 0         | 151                | 0                     | 0     | 0        | 1             | 0               | 0          | 0           | 0                    |   |
|  | Mongoose               | 6                | 0                  | 0                | 0             | 0     | 0               | 1          | 0                | 2                | 1     | 0        | 0      | 2          | 0       | 0          | 2        | 0                      | 0         | 4                  | 0                     | 82    | 1        | 0             | 0               | 1          | 0           | 0                    |   |
|  | Hog_Red_River          | 1                | 0                  | 1                | 1             | 0     | 0               | 0          | 0                | 33               | 29    | 0        | 2      | 4          | 0       | 0          | 0        | 1                      | 0         | 0                  | 0                     | 0     | 0        | 29            | 164             | 76         | 14          | 17                   |   |
|  | Buffalo_African        | 3                | 0                  | 0                | 0             | 2     | 0               | 0          | 1                | 53               | 14    | 0        | 2      | 1          | 3       | 0          | 0        | 0                      | 0         | 0                  | 0                     | 0     | 29       | 164           | 76              | 14         | 17          |                      |   |
|  | Duiker_Red             | 11               | 0                  | 2                | 1             | 6     | 0               | 0          | 0                | 80               | 68    | 1        | 2      | 15         | 0       | 2          | 0        | 0                      | 2         | 0                  | 1                     | 0     | 4        | 11            | 3               | 5700       | 287         | 11                   |   |
|  | Duiker_Blue            | 22               | 0                  | 9                | 0             | 4     | 2               | 5          | 1                | 24               | 39    | 0        | 7      | 9          | 1       | 0          | 4        | 0                      | 3         | 0                  | 0                     | 4     | 16       | 0             | 157             | 3237       | 2           |                      |   |
|  | Duiker_Yellow_Backed   | 1                | 0                  | 1                | 0             | 2     | 0               | 0          | 0                | 58               | 27    | 0        | 2      | 2          | 1       | 2          | 0        | 1                      | 0         | 0                  | 0                     | 0     | 8        | 8             | 64              | 22         | 493         |                      |   |
|  |                        | Bird             | Guineafowl_Crested | Guineafowl_Black | Rail_Nkulengu | Blank | Leopard_African | Cat_Golden | Chevrotain_Water | Elephant_African | Human | Pangolin | Monkey | Chimpanzee | Gorilla | Mandrillus | Squirrel | Porcupine_Brush_Tailed | Rat_Giant | Civet_African_Palm | Mongoose_Black_Footed | Genet | Mongoose | Hog_Red_River | Buffalo_African | Duiker_Red | Duiker_Blue | Duiker_Yellow_Backed |   |

596

597 **Figure S7.** Confusion matrix showing model performance on out of sample test data (absolute

598 numbers). Figure S2 shows the confusion matrix with each row normalized independently.

599

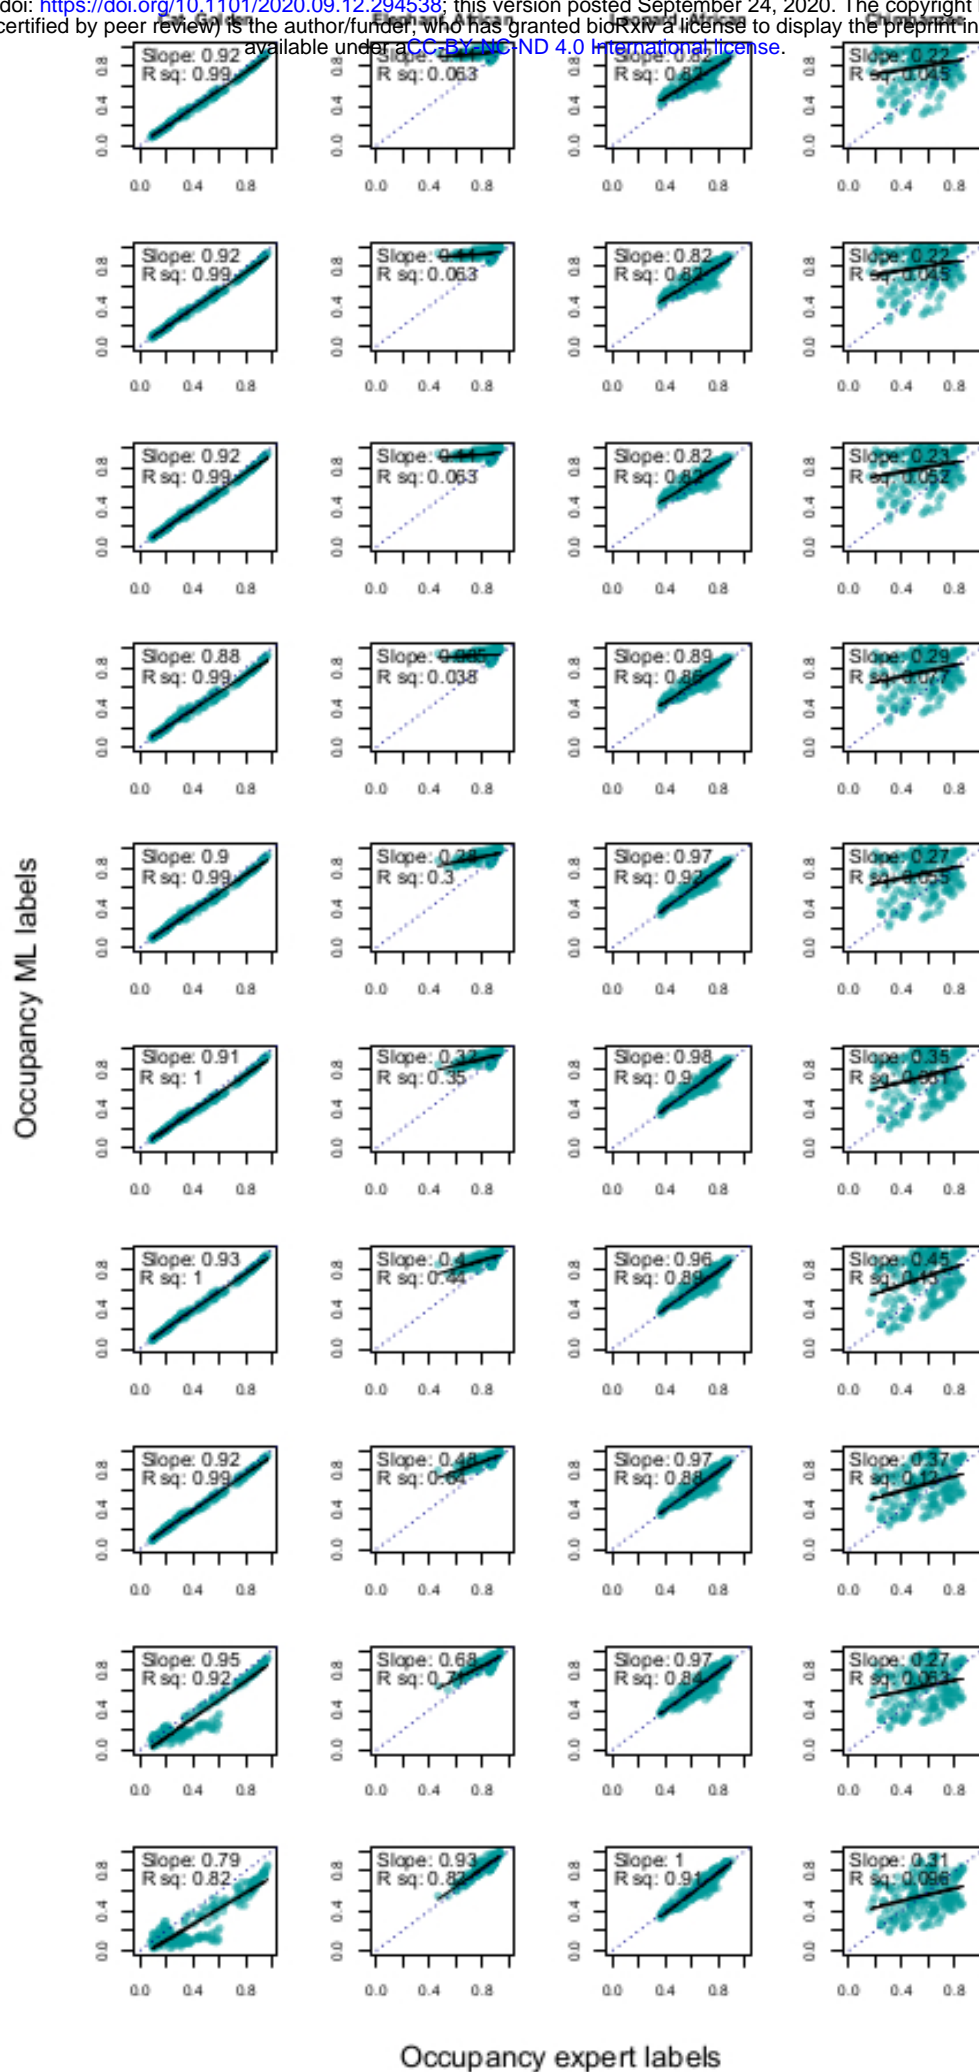

Occupancy expert labels

601 **ABOVE: Figure S8.** Relationship between estimated occupancy probability for  $n = 227$  camera  
602 stations (points) from machine learning (ML) labels (y-axis) and expert labels (x-axis) for the four  
603 focal species at each threshold (row) from 0 to 90%, in 10% intervals.

604

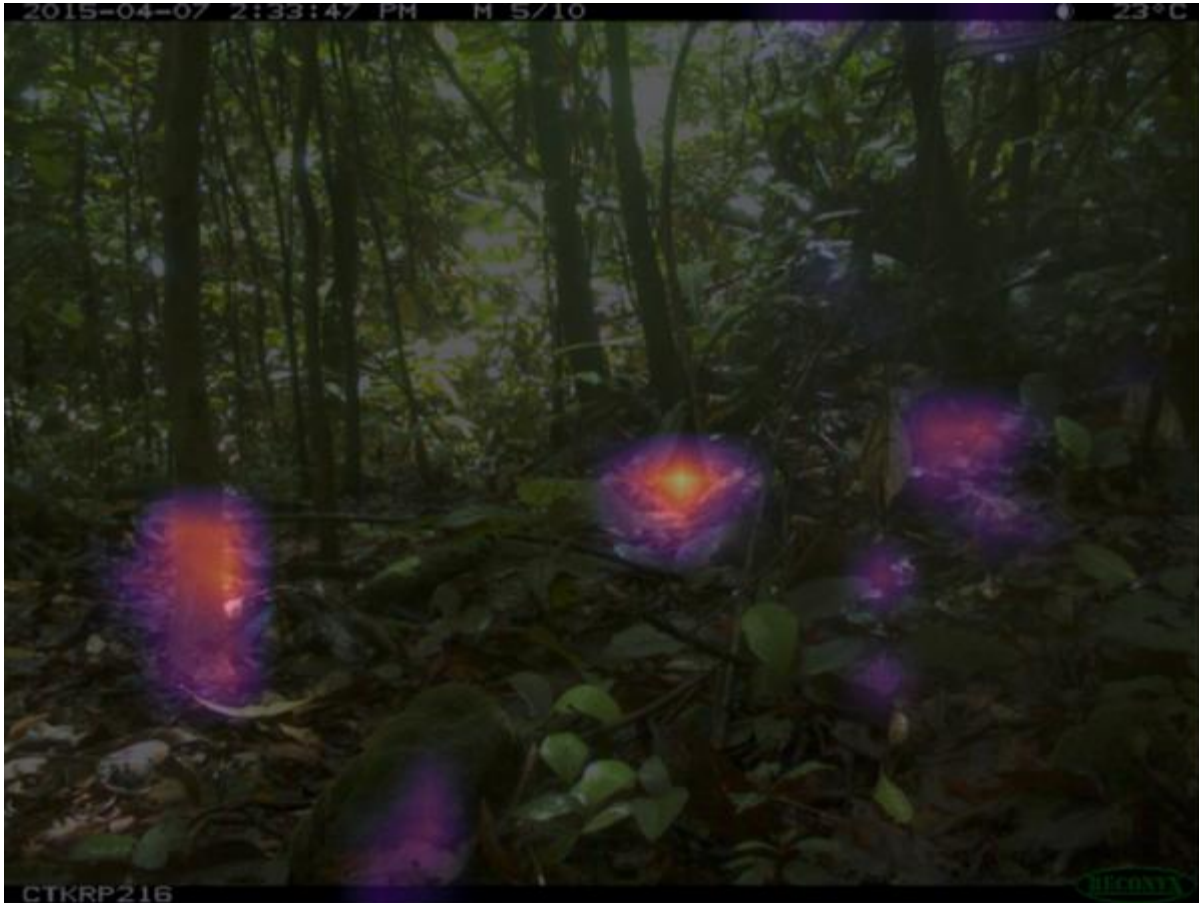

605

606 **Figure S9.** The image from Figure 9 with an added layer illustrating the most important regions of the  
607 image for the model when identifying the nkulengu rail. The brightest spot (yellow) near the center of  
608 the image encompasses a part of the bird's beak and head, which apparently were crucial during identi-  
609 fication. We used the Grad-CAM (1) technique to create this image.

610

## 611 **SI References**

1. R. R. Selvaraju, *et al.*, Grad-CAM: Visual Explanations From Deep Networks via Gradient-Based Localization in (2017), pp. 618–626.

612
